# Supplementary material for: Transdermal nanolipoplex simultaneously inhibits subcutaneous melanoma growth and suppresses systemically metastatic melanoma by activating host immunity
Source: Research Square preprint supplement (doi:10.21203/rs.3.rs-1425588/v1), 2022-03-10
Supplement: Supplementary file 1 [file 19479c3f312cc44924bef7ed.xlsx]

## Sheet: cell proliferation
cell proliferation- enriched genes (21)
Gene	GeneCards	GO Feature	KEGG ID	KEGG Description	PMID	Reference
APLN	Among its related pathways are Peptide ligand-binding receptors and Signaling by GPCR.	Gene Ontology (GO) annotations related to this gene include signaling receptor binding and G protein-coupled receptor binding.	hsa04371	Apelin signaling pathway	-	-
CALML4	Among its related pathways are Relaxin signaling pathway and Salivary secretion.	Gene Ontology (GO) annotations related to this gene include calcium ion binding.	hsa05200	Pathways in cancer	-	-
CAMK1	Among its related pathways are alcium signaling pathway and Aldosterone synthesis and secretion.	Gene Ontology (GO) annotations related to this gene include transferase activity, transferring phosphorus-containing groups and protein tyrosine kinase activity.	hsa05214	Glioma	-	-
CDK2	Activity of this protein is especially critical during the G1 to S phase transition.	Gene Ontology (GO) annotations related to this gene include transferase activity, transferring phosphorus-containing groups and protein tyrosine kinase activity. An important paralog of this gene is PAK4.	hsa05200	Pathways in cancer	-	-
COL2A1	Among its related pathways are Collagen chain trimerization and ERK Signaling.	Gene Ontology (GO) annotations related to this gene include identical protein binding and platelet-derived growth factor binding.	hsa04151	PI3K-Akt signaling pathway	-	-
CPEB1	May play a role in cell proliferation and tumorigenesis. /Among its related pathways are Aurora A signaling and Translational Control.	Gene Ontology (GO) annotations related to this gene include nucleic acid binding and nucleotide binding.	hsa04114	Oocyte meiosis	-	-
FOS	Among its related pathways are RANK Signaling in Osteoclasts and Prolactin Signaling Pathway.	Gene Ontology (GO) annotations related to this gene include DNA-binding transcription factor activity and transcription factor binding.	hsa05200	Pathways in cancer	-	-
HRAS	Among its related pathways areCCR5 Pathway in Macrophages and EGFR Transactivation by Gastrin.	Gene Ontology (GO) annotations related to this gene include GTP binding and protein C-terminus binding.	hsa05200	Pathways in cancer	-	-
IGF1R	Among its related pathways are Jak-Stat Signaling Pathway (sino) and Longevity regulating pathway.	Gene Ontology (GO) annotations related to this gene include identical protein binding and protein kinase activity.	hsa05200	Pathways in cancer	-	-
MTOR	Among its related pathways arePI3K/AKT activation and EGFR Transactivation by Gastrin.	Gene Ontology (GO) annotations related to this gene include transferase activity, transferring phosphorus-containing groups and protein serine/threonine kinase activity.	hsa05200	Pathways in cancer	-	-
PFKFB3	Among its related pathways are AMP-activated Protein Kinase (AMPK) Signaling and Fructose and mannose metabolism.	Gene Ontology (GO) annotations related to this gene include6-phosphofructo-2-kinase activityandfructose-2,6-bisphosphate 2-phosphatase activity.	hsa04066	HIF-1 signaling pathway	-	-
PLK2	It may also play an important role in cells undergoing rapid cell division. /Among its related pathways are DNA Damage and FoxO signaling pathway.	Gene Ontology (GO) annotations related to this gene include transferase activity, transferring phosphorus-containing groups and protein tyrosine kinase activity.	hsa04068	FoxO signaling pathway	-	-
PRKAR2B	Among its related pathways are DAG and IP3 signaling and PAK Pathway.	Gene Ontology (GO) annotations related to this gene include protein kinase binding and cAMP binding.	hsa04910	Insulin signaling pathway	-	-
TCF7L1	Among its related pathways are Arrhythmogenic right ventricular cardiomyopathy and Wnt signaling pathway.	Gene Ontology (GO) annotations related to this gene include DNA-binding transcription factor activity and chromatin binding.	hsa05200	Pathways in cancer	-	-
YWHAQ	Its related pathways are Beta-Adrenergic Signaling and MAPK-Erk Pathway.	Gene Ontology (GO) annotations related to this gene include protein domain specific binding and protein N-terminus binding. An important paralog of this gene is YWHAB.	hsa04151	PI3K-Akt signaling pathway	-	-
BCL9L	Among its related pathways are Signaling by Wnt and Activated PKN1 stimulates transcription of AR (androgen receptor) regulated genes KLK2 and KLK3.	Gene Ontology (GO) annotations related to this gene include transcription coactivator activity and beta-catenin binding.	-	-	33117820	miR-766-3p Targeting BCL9L Suppressed Tumorigenesis, Epithelial-Mesenchymal Transition, and Metastasis Through the β-Catenin Signaling Pathway in Osteosarcoma Cells
EPO	Among its related pathways are Beta-Adrenergic Signaling and Hematopoietic Stem Cell Differentiation.	Gene Ontology (GO) annotations related to this gene include hormone activity and erythropoietin receptor binding.	-	-	21750199	The Role of Erythropoietin and Erythropoiesis-Stimulating Agents in Tumor Progression
ETV5	Among its related pathways are Transcriptional misregulation in cancer and IL12 signaling mediated by STAT4.	Gene Ontology (GO) annotations related to this gene include DNA-binding transcription factor activity and transcription regulatory region DNA binding.	-	-	26238631	PEA3 transcription factors are downstream effectors of Met signaling involved in migration and invasiveness of Met-addicted tumor cells
PDE8A	Among its related pathways are Signaling by GPCR and DAG and IP3 signaling.	Gene Ontology (GO) annotations related to this gene include obsolete signal transducer activity and 3',5'-cyclic-AMP phosphodiesterase activity.	-	-	30909892	Targeting B-Raf inhibitor resistant melanoma with novel cell penetrating peptide disrupters of PDE8A - C-Raf
SLC39A7	This transport may be important for activation of tyrosine kinases, some of which could be involved in cancer progression./Among its related pathways are Metal ion SLC transporters and NRF2 pathway.	Gene Ontology (GO) annotations related to this gene include metal ion transmembrane transporter activity.	-	-	28205653	Phosphorylation of zinc channel ZIP7 drives MAPK, PI3K and mTOR growth and proliferation signalling
TGFB2	Among its related pathways are GPCR Pathway and PAK Pathway.	Gene Ontology (GO) annotations related to this gene include protein homodimerization activity and signaling receptor binding.	-	-	20001556	Targeting the transforming growth factor-beta signaling pathway in human cancer
cell proliferation- non-enriched genes (51)
APH1A	Among its related pathways are Notch Signaling Pathway and Signaling by ERBB4.	Gene Ontology (GO) annotations related to this gene include endopeptidase activity.	-	-	-	-
ARID4A	Among its related pathways are Development NOTCH1-mediated pathway for NF-KB activity modulation and Chromatin organization.	Gene Ontology (GO) annotations related to this gene include DNA-binding transcription factor activity and transcription regulatory region DNA binding.	-	-	-	-
ARMCX2	This gene encodes a protein containing a potential N-terminal transmembrane domain and multiple armadillo (arm) repeats. Proteins containing arm repeats are involved in development, maintenance of tissue integrity, and tumorigenesis.	Gene Ontology (GO) annotations related to this gene include binding.	-	-	-	-
ARMCX3	This gene encodes a member of the ALEX family of proteins which may play a role in tumor suppression.	Gene Ontology (GO) annotations related to this gene include binding.	-	-	-	-
ATF6	Among its related pathways are TCR Signaling (Qiagen) and Sertoli-Sertoli Cell Junction Dynamics.	Gene Ontology (GO) annotations related to this gene include DNA-binding transcription factor activity and protein heterodimerization activity.	-	-	-	-
C2CD2L	Plays a key role in the coordination of Ca(2+) and phosphoinositide signaling: localizes to sites of contact between the endoplasmic reticulum and the cell membrane.	Gene Ontology (GO) annotations related to this gene include insulin binding.	-	-	-	-
CACYBP	Among its related pathways are Gastric Cancer Network 2 and Wnt signaling pathway.	Gene Ontology (GO) annotations related to this gene include protein homodimerization activity.	-	-	-	-
CDC34B	Among its related pathways are Metabolism of proteins and Ubiquitin mediated proteolysis.	Gene Ontology (GO) annotations related to this gene include ligase activity and ubiquitin protein ligase binding.	-	-	-	-
CDH9	Among its related pathways are S-1P Stimulated Signaling and Nanog in Mammalian ESC Pluripotency.	Gene Ontology (GO) annotations related to this gene include calcium ion binding.	-	-	-	-
CEP250	Among its related pathways are Organelle biogenesis and maintenance and Mesodermal Commitment Pathway.	Gene Ontology (GO) annotations related to this gene include protein kinase binding and protein C-terminus binding.	-	-	-	-
CHRAC1	Histone-fold protein dimers combine within larger enzymatic complexes for DNA transcription, replication, and packaging.	Gene Ontology (GO) annotations related to this gene include sequence-specific DNA binding and DNA-directed DNA polymerase activity.	-	-	-	-
CNOT7	Among its related pathways are Cyclins and Cell Cycle Regulation and Deadenylation-dependent mRNA decay.	Gene Ontology (GO) annotations related to this gene include nucleic acid binding and RNA binding.	-	-	-	-
CORO1C	Required for normal cell proliferation, cell migration, and normal formation of lamellipodia (By similarity).	Gene Ontology (GO) annotations related to this gene include actin filament binding.	-	-	-	-
DNPH1	The exact function of this gene is not known but studies in rat suggest a role in cellular proliferation and c-Myc-mediated transformation.	Gene Ontology (GO) annotations related to this gene include protein homodimerization activity and deoxyribonucleoside 5'-monophosphate N-glycosidase activity.	-	-	-	-
EGLN1	Among its related pathways are HIF-1-alpha transcription factor network and Photodynamic therapy-induced HIF-1 survival signaling.	Gene Ontology (GO) annotations related to this gene include enzyme binding and iron ion binding.	-	-	-	-
EML1	Modulates the assembly and organization of the microtubule cytoskeleton, and probably plays a role in regulating the orientation of the mitotic spindle and the orientation of the plane of cell division.	Gene Ontology (GO) annotations related to this gene include calcium ion binding and tubulin binding.	-	-	-	-
FAM57A	Knockdown of this gene also inhibited lung carcinogenesis and tumor cell growth.	-	-	-	-	-
GPC6	Among its related pathways are GPCR Pathway and PAK Pathway.	Gene Ontology (GO) annotations related to this gene include heparan sulfate proteoglycan binding.	-	-	-	-
GPNMB	Among its related pathways are Adhesion and Signaling by PTK6.	Gene Ontology (GO) annotations related to this gene include heparin binding and integrin binding. An important paralog of this gene is TMEM130.	-	-	-	-
HAPLN1	Among its related pathways are ERK Signaling and ECM proteoglycans.	Gene Ontology (GO) annotations related to this gene include extracellular matrix structural constituent and hyaluronic acid binding.	-	-	-	-
HHEX	Among its related pathways are Transcriptional misregulation in cancer and Mesodermal Commitment Pathway.	Gene Ontology (GO) annotations related to this gene include DNA-binding transcription factor activity and sequence-specific DNA binding.	-	-	-	-
HIGD1B	The encoded protein is localized to the cell membrane and has been linked to tumorigenesis and the progression of pituitary adenomas.	-	-	-	-	-
INSIG1	Among its related pathways are Regulation of cholesterol biosynthesis by SREBP (SREBF) and Chks in Checkpoint Regulation.	-	-	-	-	-
LBH	Transcriptional activator which may act in mitogen-activated protein kinase signaling pathway.	-	-	-	-	-
LMO1	The encoded protein may regulate transcription by competitively binding to specific DNA-binding transcription factors.	-	-	-	-	-
LMO4	Among its related pathways are Embryonic and Induced Pluripotent Stem Cells and Lineage-specific Markers and IL6-mediated signaling events.	Gene Ontology (GO) annotations related to this gene include DNA-binding transcription factor activity and enhancer sequence-specific DNA binding.	-	-	-	-
LYVE1	Among its related pathways are Cell adhesion_Cell-matrix glycoconjugates and Glycosaminoglycan metabolism.	Gene Ontology (GO) annotations related to this gene include hyaluronic acid binding.	-	-	-	-
MAP3K7CL	Among its related pathways are Integrated Breast Cancer Pathway.	-	-	-	-	-
MPP5	Among its related pathways are Cell junction organization and Sertoli-Sertoli Cell Junction Dynamics.	-	-	-	-	-
NEK8	The encoded protein may play a role in cell cycle progression from G2 to M phase.	Gene Ontology (GO) annotations related to this gene include transferase activity, transferring phosphorus-containing groups and protein tyrosine kinase activity.	-	-	-	-
OFD1	Among its related pathways are Organelle biogenesis and maintenance and Signaling by Hedgehog.	Gene Ontology (GO) annotations related to this gene include alpha-tubulin binding and gamma-tubulin binding.	-	-	-	-
PAX9	Among its related pathways are Mesodermal Commitment Pathway and Wnt Hedgehog Notch.	Gene Ontology (GO) annotations related to this gene include RNA polymerase II regulatory region sequence-specific DNA binding and DNA-binding transcription activator activity, RNA polymerase II-specific.	-	-	-	-
PHB2	Among its related pathways are MAPK Signaling: Mitogens and GPCR Pathway.	Gene Ontology (GO) annotations related to this gene include estrogen receptor binding.	-	-	-	-
POLDIP2	Involved in DNA damage tolerance by regulating translesion synthesis (TLS) of templates carrying DNA damage lesions such as 8oxoG and abasic sites (PubMed:24191025).	-	-	-	-	-
POLE2	Among its related pathways are Transcription-Coupled Nucleotide Excision Repair (TC-NER) and E2F mediated regulation of DNA replication.	Gene Ontology (GO) annotations related to this gene include DNA-directed DNA polymerase activity.	-	-	-	-
PPAN	Both SSF1 and ppan are essential for cell growth and proliferation.	Gene Ontology (GO) annotations related to this gene include RNA binding.	-	-	-	-
PSEN2	Among its related pathways are Signaling by ERBB4 and Signaling by NOTCH1.	Gene Ontology (GO) annotations related to this gene include endopeptidase activity and aspartic-type endopeptidase activity.	-	-	-	-
PTPN18	Among its related pathways are Signaling by ERBB2 and PAK Pathway.	Gene Ontology (GO) annotations related to this gene include phosphatase activity and non-membrane spanning protein tyrosine phosphatase activity.	-	-	-	-
RBMS1	-	Gene Ontology (GO) annotations related to this gene include nucleic acid binding and RNA binding.	-	-	-	-
RHOV	Among its related pathways are Signaling by Rho GTPases and p75 NTR receptor-mediated signalling.	Gene Ontology (GO) annotations related to this gene include GTP binding.	-	-	-	-
RNF167	May play a role in growth regulation involved in G1/S transition.	Gene Ontology (GO) annotations related to this gene include ligase activity and ubiquitin-protein transferase activity.	-	-	-	-
RNF40	Among its related pathways are Metabolism of proteins and ATM Signaling Network in Development and Disease.	Gene Ontology (GO) annotations related to this gene include protein homodimerization activity and ubiquitin-protein transferase activity.	-	-	-	-
RPA3	Among its related pathways are Translesion synthesis by Y family DNA polymerases bypasses lesions on DNA template and Transcription-Coupled Nucleotide Excision Repair (TC-NER).	Gene Ontology (GO) annotations related to this gene include single-stranded DNA binding and damaged DNA binding.	-	-	-	-
SCYL1	This gene encodes a transcriptional regulator belonging to the SCY1-like family of kinase-like proteins. It activates transcription of the telomerase reverse transcriptase and DNA polymerase beta genes.	Gene Ontology (GO) annotations related to this gene include transferase activity, transferring phosphorus-containing groups and protein tyrosine kinase activity.	-	-	-	-
SIX4	Among its related pathways are Transcriptional misregulation in cancer and mir-124 predicted interactions with cell cycle and differentiation.	Gene Ontology (GO) annotations related to this gene include DNA-binding transcription factor activity and sequence-specific DNA binding.	-	-	-	-
SMO	Among its related pathways are Proteoglycans in cancer and Hedgehog signaling pathway (KEGG).	Gene Ontology (GO) annotations related to this gene include G protein-coupled receptor activity and PDZ domain binding.	-	-	-	-
SRRT	Involved in cell cycle progression at S phase.	Gene Ontology (GO) annotations related to this gene include RNA binding.	-	-	-	-
TSPAN13	The proteins mediate signal transduction events that play a role in the regulation of cell development, activation, growth and motility.	-	-	-	-	-
TSPAN15	The proteins mediate signal transduction events that play a role in the regulation of cell development, activation, growth and motility.	Gene Ontology (GO) annotations related to this gene include enzyme binding.	-	-	-	-
USP2	Among its related pathways are DNA Damage and Metabolism of proteins.	Gene Ontology (GO) annotations related to this gene include identical protein binding and cysteine-type endopeptidase activity.	-	-	-	-
VASN	May act as an inhibitor of TGF-beta signaling.	Gene Ontology (GO) annotations related to this gene include transforming growth factor beta binding.	-	-	-	-
