# Supplementary material for: Transdermal nanolipoplex simultaneously inhibits subcutaneous melanoma growth and suppresses systemically metastatic melanoma by activating host immunity
Source: Research Square preprint supplement (doi:10.21203/rs.3.rs-1425588/v1), 2022-03-10
Supplement: Supplementary file 5 [file da04205dbbab6b772f5a988a.xlsx]

## Sheet: Table S1 468 genes
Sum	PBS	LDC	p-value	72	8	15	4	5	13	6	4	13	20	4	18	8	4	23	106	32	18	19	19	14	4	11	19	20	8	60
Gene				Cell.Growth	Angiogenesis	Carbon hydrate metabolism	Fatty acid metabolism	Glycerolipids metabolism	Phospholipid metabolism	lipoproteins metabolism	Sterols metabolism	Amino acid metabolism	Protein metabolism	TCA cycle	Nucleotide metabolism	Vitemin metabolism	Mineral metabolism	Apoptosis	Immune	Metastasis	Signaling	Nuclear.Activity	DNA.Binding	RNA.Binding	RNA.Splicing	Neuron	Protein.experssion	Transpot	DNA.repair	Unknown	Feature
ABHD12	66.7522	87.0211	0.02061																		V										Cell Signaling	Among its related pathways are S-1P Stimulated Signaling and Innate Immune System.	Gene Ontology (GO) annotations related to this gene include N-acylsphingosine amidohydrolase activity.
ACOT8	7.76308	11.9224	0.01506				V									V															Fatty acid metabolism	These proteins play a role in protein degradation by coupling suppressor of cytokine signalling (SOCS) proteins with the elongin BC complex.	Among its related pathways are Class I MHC mediated antigen processing and presentation and Innate Immune System. Gene Ontology (GO) annotations related to this gene include ubiquitin-protein transferase activity.
ACTN4	164.676	202.994	0.02184																	V											Metastasis
ACVR1	44.4837	35.4574	0.01245																V												Immunology	TCA cycle	Among its related pathways are Alanine and aspartate metabolism and CDK-mediated phosphorylation and removal of Cdc6. Gene Ontology (GO) annotations related to this gene include argininosuccinate lyase activity.	The encoded protein forms a cytosolic homotetramer and primarily catalyzes the reversible hydrolytic cleavage of argininosuccinate into arginine and fumarate, an essential step in the liver in detoxifying ammonia via the urea cycle.
ADAR	14.4276	21.431	0.0271																V												Immunology	?Immunology	This protein has been identified as a survival factor for quiescent but not proliferative squamous carcinoma cells.	Among its related pathways are?TCR Signaling (Qiagen)?and?Sertoli-Sertoli Cell Junction Dynamics. Gene Ontology (GO) annotations related to this gene include?DNA-binding transcription factor activity?and?protein heterodimerization activity.?
ADCY3	12.5109	19.0704	0.02096																V												Immunology	Among its related pathways are?Hepatic ABC Transporters?and?Neuropathic Pain-Signaling in Dorsal Horn Neurons. Gene Ontology (GO) annotations related to this gene include?ATPase binding?and?sodium:potassium-exchanging ATPase activity.?
ADGRE5	31.9981	55.0847	0.00068																V												Immunology	Among its related pathways are RET signaling and Ion channel transport. Gene Ontology (GO) annotations related to this gene include proton transmembrane transporter activity and ATPase-coupled transmembrane transporter activity.
ADH7	0.32951	0.8194	0.0087			V		V			V	V				V						V						V			Carbon hydrate	Among its related pathways are Innate Immune System and Metabolism. Gene Ontology (GO) annotations related to this gene include transporter activity and proton-transporting ATPase activity, rotational mechanism.
ADM	94.0824	33.3081	0.00138		V																										Angiogenesis	Gene Ontology (GO) annotations related to this gene include acyltransferase activity, transferring groups other than amino-acyl groups and long-chain-alcohol O-fatty-acyltransferase activity.
ADORA2A	0.18615	0.63958	0.00415																V												Immunology	Carbon hydrate	Nucleotide metabolism	Among its related pathways are Sweet Taste Signaling and Glycosaminoglycan metabolism. Gene Ontology (GO) annotations related to this gene include protein homodimerization activity and cytoskeletal protein binding.	The second activity is restricted to lactating mammary tissues where the enzyme forms a heterodimer with alpha-lactalbumin to catalyze UDP-galactose + D-glucose <=> UDP + lactose.
AEBP1	190.967	250.318	0.0287																				V								DNA.Binding	Nucleotide metabolism	Among its related pathways are Sweet Taste Signaling and Glycosaminoglycan metabolism. Gene Ontology (GO) annotations related to this gene include glycosyltransferase activity and galactosyltransferase activity.	Family members encode type II membrane-bound glycoproteins that appear to have exclusive specificity for the donor substrate UDP-galactose.
AGBL5	11.1753	7.03773	0.01879																								V				post-translation modification	Among its related pathways are Alzheimers Disease Pathway. Gene Ontology (GO) annotations related to this gene include aspartic-type endopeptidase activity.
AGPAT4	20.3503	11.5846	0.0219						V							V															Phospholipid metabolism	Among its related pathways are?Signaling by Wnt?and?Activated PKN1 stimulates transcription of AR (androgen receptor) regulated genes KLK2 and KLK3. Gene Ontology (GO) annotations related to this gene include?transcription coactivator activity?and?beta-catenin binding.?
AHDC1	1.20492	1.83238	0.01726																											V	Unknown	Among its related pathways are?Histidine, lysine, phenylalanine, tyrosine, proline and tryptophan catabolism?and?Amino Acid metabolism. Gene Ontology (GO) annotations related to this gene include?fumarylacetoacetase activity.?
AHSG	2.63455	0.33648	0.04438																V												Immunology	Among its related pathways are?Amino Acid metabolism?and?Amino acid synthesis and interconversion (transamination). Gene Ontology (GO) annotations related to this gene include?identical protein binding?and?oxidoreductase activity.?
AKAP6	1.39009	1.1422	0.04733																		V										Cell Signaling	Among its related pathways are PEDF Induced Signaling and fMLP Pathway. Gene Ontology (GO) annotations related to this gene include ion channel binding.
AMN	0.03265	0.14897	0.04236							V						V															lipoproteins metabolism	Among its related pathways are?Histidine, lysine, phenylalanine, tyrosine, proline and tryptophan catabolism?and?Metabolism. Gene Ontology (GO) annotations related to this gene include?protein homodimerization activity?and?glutathione peroxidase activity.?
ANKRD10	15.3954	21.2316	0.03269																											V	Unknown	Phospholipid metabolism	Among its related pathways are Adipogenesis and Glucose / Energy Metabolism.	Plays a crucial role in the formation of lipid droplets (LDs) which are storage organelles at the center of lipid and energy homeostasis (PubMed:19278620, PubMed:21533227, PubMed:31708432, PubMed:30293840). Binds anionic phospholipids including phosphatidic acid (PubMed:30293840). Plays an important role in the differentiation and development of adipocytes
ANO8	11.2334	14.2693	0.03412																									V			Metabolism
ANXA5	216.382	314.902	0.0315															V													Apoptosis	Among its related pathways are?Class I MHC mediated antigen processing and presentation?and?Innate Immune System.?
ANXA7	23.6104	32.2087	0.00016						V								V														Phospholipid metabolism	Plays a key role in the coordination of Ca(2+) and phosphoinositide signaling: localizes to sites of contact between the endoplasmic reticulum and the cell membrane	Gene Ontology (GO) annotations related to this gene include insulin binding.
APH1A	59.3741	79.0808	0.02974	V																											Cell proliferation	Among its related pathways are Peptide ligand-binding receptors and Immune response Lectin induced complement pathway. Gene Ontology (GO) annotations related to this gene include G protein-coupled receptor activity and complement component C3a receptor activity.
APLN	10.9149	19.2562	0.03748	V																											Cell proliferation	Among its related pathways are Gastric Cancer Network 2 and Wnt signaling pathway. Gene Ontology (GO) annotations related to this gene include protein homodimerization activity.
APOBEC2	2.19328	0.75776	0.00535																					V							RNA.Binding	Interaction with CRTAM promotes natural killer (NK) cell cytotoxicity and interferon-gamma (IFN-gamma) secretion by CD8+ cells in vitro as well as NK cell-mediated rejection of tumors expressing CADM1 in vivo (	Among its related pathways are?Cell junction organization?and?Cell adhesion molecules. Gene Ontology (GO) annotations related to this gene include?protein homodimerization activity?and?PDZ domain binding.?
APOLD1	104.019	79.9649	0.04446		V																										Angiogenesis	Among its related pathways are?Relaxin signaling pathway?and?Salivary secretion. Gene Ontology (GO) annotations related to this gene include?calcium ion binding.?
ARF4	166.515	231.207	0.01045						V						V																Phospholipid metabolism	Protein metabolism	Mineral metabolism	Among its related pathways are HIV Life Cycle and Metabolism of proteins. Gene Ontology (GO) annotations related to this gene include RNA binding and ubiquitin protein ligase binding.
ARHGAP23	4.40164	10.5514	0.04034																	V											Cell migration	Among its related pathways are Response to elevated platelet cytosolic Ca2+ and Signaling by GPCR. Gene Ontology (GO) annotations related to this gene include hydrolase activity and acylglycerol lipase activity.
ARHGEF25	10.965	16.1513	0.02182																	V											Cell migration	Among its related pathways are Synthesis of bile acids and bile salts and alpha-linolenic acid (ALA) metabolism. Gene Ontology (GO) annotations related to this gene include signaling receptor binding and palmitoyl-CoA hydrolase activity.
ARID4A	16.0615	14.2389	0.00544	V																											Cell proliferation	Among its related pathways are?Calcium signaling pathway?and?Aldosterone synthesis and secretion. Gene Ontology (GO) annotations related to this gene include?transferase activity, transferring phosphorus-containing groups?and?protein tyrosine kinase activity.?
ARMCX2	21.6822	29.112	0.03884	V																											Cell proliferation	Among its related pathways are?Degradation of the extracellular matrix?and?Keratinization. Gene Ontology (GO) annotations related to this gene include?calcium ion binding?and?calcium-dependent cysteine-type endopeptidase activity.
ARMCX3	5.74026	10.6666	0.01615	V																											Cell proliferation	Among its related pathways are?Degradation of the extracellular matrix?and?Apoptosis Pathway. Gene Ontology (GO) annotations related to this gene include?calcium ion binding?and?peptidase activity.?
ARMCX5	3.94076	5.34342	0.04705																											V	Unknown	Among its related pathways are?Viral mRNA Translation?and?Metabolism.	The protein encoded by this gene is a methyltransferase that converts carnosine to anserine, a dipeptide found abundantly in skeletal muscle.
ARPC1B	90.5216	165.077	0.02576																V												Immunology	Nuclear.Activity	Among its related pathways are?Sertoli-Sertoli Cell Junction Dynamics?and?Syndecan-3-mediated signaling events. Gene Ontology (GO) annotations related to this gene include?transferase activity, transferring phosphorus-containing groups?and?protein tyrosine kinase activity.?
ARRDC2	3.02039	3.58766	0.04991																											V	Unknown	Among its related pathways are VEGF Pathway (Tocris) and Apoptosis Pathway. Gene Ontology (GO) annotations related to this gene include cysteine-type endopeptidase activity and cysteine-type endopeptidase activity involved in execution phase of apoptosis.
ARSA	25.5111	38.8935	0.00708										V				V									V					Protein metabolism	Among its related pathways are?Sudden Infant Death Syndrome (SIDS) Susceptibility Pathways. Gene Ontology (GO) annotations related to this gene include?obsolete signal transducer activity?and?DNA-binding transcription factor activity, RNA polymerase II-specific.
ASAH1	83.7836	108.231	0.04301																V												Immunology	Cell migration		The encoded protein functions as a cofactor required for p53-mediated apoptosis following DNA damage, and may also play a role in growth through interactions with the cytoskeletal adaptor protein obscurin-like 1.
ASB2	10.4217	4.33232	0.02714																V												Immunology	Acts as a positive regulator of T-cell maturation and inflammatory function. Required for several functions of T-cells, in both the CD4(+) and the CD8(+) compartments
ASL	36.9547	47.3398	0.03801									V		V																	Amino acid metabolism	Gene Ontology (GO) annotations related to this gene include?identical protein binding.
ATF6	33.5393	24.6398	0.00516	V															V												Cell proliferation	Among its related pathways are?Peptide ligand-binding receptors?and?Signaling by GPCR. Gene Ontology (GO) annotations related to this gene include?hormone activity?and?neuropeptide hormone activity.
ATP1B2	3.11287	2.13938	0.04798																		V										Cell signaling	Among its related pathways are CCR5 Pathway in Macrophages and IL1 and megakaryocytes in obesity. Gene Ontology (GO) annotations related to this gene include protein kinase activity and heparin binding.
ATP6V1B2	150.229	192.602	0.01599												V													V			Nucleotide metabolism	This protein is expressed by T cells and macrophages	Among its related pathways are CCR5 Pathway in Macrophages and Jak-Stat Signaling Pathway (sino). Gene Ontology (GO) annotations related to this gene include G protein-coupled receptor activity and phosphatidylinositol phospholipase C activity.
ATP6V1C1	127.96	150.575	0.04332																V												Immunology	Among its related pathways are?Dendritic Cells Developmental Lineage Pathway?and?CDK-mediated phosphorylation and removal of Cdc6. Gene Ontology (GO) annotations related to this gene include?carbohydrate binding?and?mannose binding.?
AWAT2	0.61227	0.2435	0.04296						V																						Phospholipid metabolism	Among its related pathways are Hematopoietic cell lineage and L1CAM interactions. Gene Ontology (GO) annotations related to this gene include protein kinase binding and carbohydrate binding.
B4GALT1	14.8933	21.0735	0.00169			V									V				V												Immunology	This encoded protein is a cell surface glycoprotein that is known to complex with integrins. It contributes to the transduction of CD2-generated signals in T cells and natural killer cells and has been suggested to play a role in growth regulation.	Among its related pathways are Innate Immune System.
B4GALT7	13.5107	18.6913	0.0012			V									V																Carbon hydrate	Binds to tissue- and organ-specific lectins or selectins, allowing homing of macrophage subsets to particular sites.	Among its related pathways are Innate Immune System and Hematopoietic Stem Cells and Lineage-specific Markers.
BACE2	68.6853	99.4573	0.00838									V																			Amino acid metabolism	Protein metabolism	Apoptosis	Among its related pathways are Metabolism of proteins and Class I MHC mediated antigen processing and presentation. Gene Ontology (GO) annotations related to this gene include ligase activity and ubiquitin protein ligase binding.
BCL9L	9.60156	8.48488	0.02747	V																											Cell proliferation	Among its related pathways are?S-1P Stimulated Signaling?and?Nanog in Mammalian ESC Pluripotency. Gene Ontology (GO) annotations related to this gene include?calcium ion binding. A
BCO2	2.20998	1.44593	0.04327													V															Metabolism	Gene Ontology (GO) annotations related to this gene include?calcium ion binding.?
BET1L	9.28068	11.9415	0.01701																							V					Metabolism	Activity of this protein is especially critical during the G1 to S phase transition.
BIN3	60.0358	98.4608	0.00594																							V					Metabolism
BORCS7	7.8241	5.98734	0.00764																											V	Metabolism	Essential for gene expression induction in activated macrophages. Plays a major role in immune responses such as CD4(+) T-cell response,	Among its related pathways are Development_Glucocorticoid receptor signaling and MAPK-Erk Pathway.	Gene Ontology (GO) annotations related to this gene include DNA-binding transcription factor activity and sequence-specific DNA binding.
BSCL2	9.01823	23.0647	0.01487					V	V																						Glycerolipids metabolism	Among its related pathways are?Organelle biogenesis and maintenance?and?Mesodermal Commitment Pathway. Gene Ontology (GO) annotations related to this gene include?protein kinase binding?and?protein C-terminus binding.
BTBD18	0.04416	0.21378	0.01031																											V	Unknown	Acts as a regulator of cilium basal body docking and positioning in mono- and multiciliated cells.?
BTBD6	6.7005	8.71787	0.03854																V												Immunology	Among its related pathways are?Immune response Lectin induced complement pathway?and?Innate Immune System. Gene Ontology (GO) annotations related to this gene include?serine-type endopeptidase activity?and?scavenger receptor activity. A
C2CD2L	42.1912	37.1692	0.00302	V																											Cell prliferation	Among its related pathways are?Development NOTCH1-mediated pathway for NF-KB activity modulation?and?Chromatin organization. Gene Ontology (GO) annotations related to this gene include?helicase activity.?
C3AR1	1.00929	3.34775	0.03739																V												Immunology	Gene Ontology (GO) annotations related to this gene include sequence-specific DNA binding and DNA-directed DNA polymerase activity.	histone-fold protein dimers combine within larger enzymatic complexes for DNA transcription, replication, and packaging.
CACYBP	161.896	144.971	0.02325	V																											Cell proliferation	Among its related pathways are Glycosaminoglycan metabolism and Metabolism. Gene Ontology (GO) annotations related to this gene include glycosyltransferase activity and glucuronosyl-N-acetylgalactosaminyl-proteoglycan 4-beta-N-acetylgalactosaminyltransferase activity.
CADM1	111.299	86.7452	0.02828																V												Immunology	Among its related pathways are?Cytokine Signaling in Immune system?and?Interleukin-6 family signaling. Gene Ontology (GO) annotations related to this gene include?protein heterodimerization activity?and?cytokine activity. A
CALML4	1.72241	0.69948	0.02538	V																											Cell proliferation	Among its related pathways are?Defective GALNT12 causes colorectal cancer 1 (CRCS1)?and?Innate Immune System. Gene Ontology (GO) annotations related to this gene include?carbohydrate binding.
CALR	694.836	1044.35	0.04847			V							V				V														Carbon hydrate	Among its related pathways are?Translation Factors. Gene Ontology (GO) annotations related to this gene include?mRNA binding.
CAMK1	85.9551	63.3982	0.02942	V																											Cell proliferation	Protein metabolism	Among its related pathways are Metabolism of proteins and Synthesis of substrates in N-glycan biosythesis. Gene Ontology (GO) annotations related to this gene include N-acylneuraminate cytidylyltransferase activity.
CAPN1	5.27568	10.832	0.02976															V													Cell migration	This gene encodes a nonmuscle, alpha actinin isoform which is concentrated in the cytoplasm, and thought to be involved in metastatic processes.	this gene include protein homodimerization activity
CAPN2	61.7157	79.7538	0.0445															V													Apoptosis	Gene Ontology (GO) annotations related to this gene include?nucleic acid binding?and?mRNA (nucleoside-2'-O-)-methyltransferase activity.?
CARNMT1	28.0708	23.791	0.00885									V																			Amino acid metabolism	negative regulation for cell proliferation	Among its related pathways are Cyclins and Cell Cycle Regulation and Deadenylation-dependent mRNA decay. Gene Ontology (GO) annotations related to this gene include nucleic acid binding and RNA binding.
CASK	6.23673	7.88526	0.00592																			V									Gene expression	Among its related pathways are Collagen chain trimerization and ERK Signaling. Gene Ontology (GO) annotations related to this gene include identical protein binding and platelet-derived growth factor binding
CASP12	0.56016	2.20549	0.03346															V													Apoptosis	This gene encodes one of the three alpha chains of type IX collagen	Among its related pathways are?Degradation of the extracellular matrix?and?Collagen chain trimerization.	Gene Ontology (GO) annotations related to this gene include?extracellular matrix structural constituent conferring tensile strength.?
CC2D1A	11.6123	14.7408	0.0134																				V								DNA.Binding	Required for normal cell proliferation, cell migration, and normal formation of lamellipodia (By similarity).	Gene Ontology (GO) annotations related to this gene include actin filament binding.
CCDC8	2.0626	0.30765	0.00219															V		V											Apoptosis	Among its related pathways are?PEDF Induced Signaling?and?PAK Pathway. Gene Ontology (GO) annotations related to this gene include?protein homodimerization activity?and?protein kinase activity.
CCDC88B	0.27329	0.5642	0.02401																V												Immunology	may play a role in cell proliferation and tumorigenesis.	Among its related pathways are?Aurora A signaling?and?Translational Control. Gene Ontology (GO) annotations related to this gene include?nucleic acid binding?and?nucleotide binding
CCDC91	34.8479	28.6005	0.02639																											V	Unknown	Diseases associated with CPNE8 include B-Cell Adult Acute Lymphocytic Leukemia.
CCK	5.03628	1.83584	0.02094																											V	Unknown	RNA.Binding	DNA.Binding	Among its related pathways are?mRNA Splicing - Major Pathway?and?Transport of the SLBP independent Mature mRNA. Gene Ontology (GO) annotations related to this gene include?nucleic acid binding.?
CCL2	6.90092	16.1393	0.00879																V												Immunology	its related pathways are Activated TLR4 signalling and Degradation of the extracellular matrix	this gene include peptidase activity and cysteine-type peptidase activity
CCR5	0.88785	2.32596	0.00846																V												Immunology	Among its related pathways are Proteoglycans in cancer and Activated TLR4 signalling. Gene Ontology (GO) annotations related to this gene include histone binding and cysteine-type peptidase activity.
CD207	0	0.11586	0.04308																V												Immunology	The mature protein cleaves the invariant chain of MHC class II molecules in endolysosomal compartments and enables the formation of antigen-MHC class II complexes and the proper display of extracellular antigenic peptides by MHC-II.	Among its related pathways are Activated TLR4 signalling and Degradation of the extracellular matrix.	Gene Ontology (GO) annotations related to this gene include peptidase activity and cysteine-type peptidase activity.
CD24A	0.68452	2.20623	0.0124																V												ImmunologyModulates B-cell activation responses. Promotes AG-dependent proliferation of B-cells, and prevents their terminal differentiation into antibody-forming cells (PubMed:11313396).	Among its related pathways are Metabolism of proteins and Class I MHC mediated antigen processing and presentation. Gene Ontology (GO) annotations related to this gene include binding and ubiquitin protein ligase binding. An important paralog of this gene is CUL9.
CD53	2.26493	9.07006	0.03184																V												Immunology	Among its related pathways are?CCR5 Pathway in Macrophages?and?PEDF Induced Signaling. Gene Ontology (GO) annotations related to this gene include?protein heterodimerization activity?and?chemokine activity.?
CD68	11.6307	22.194	0.043																V												Immunology	Among its related pathways are?MAPK-Erk Pathway?and?CASP8 activity is inhibited. Gene Ontology (GO) annotations related to this gene include?identical protein binding?and?protein kinase activity.?
CDC34B	0.48185	0.29862	0.03915	V									V																		Cell.Growth	May function as a substrate receptor for CUL4-DDB1 E3 ubiquitin-protein ligase complex.
CDH9	0.68875	0.22957	0.01519	V																											Cell proliferation	RNA.Binding	Among its related pathways are?mRNA Splicing - Major Pathway?and?Gene Expression. Gene Ontology (GO) annotations related to this gene include?nucleic acid binding?and?ATP-dependent RNA helicase activity.?
CDHR4	20.0705	16.8495	0.01354																	V											Metastasis	Among its related pathways are Interferon gamma signaling and ATP	ITP metabolism. Gene Ontology (GO) annotations related to this gene include adenosine deaminase activity.
CDK2	356.097	482.144	0.0405	V																											Cell proliferation	Gene Ontology (GO) annotations related to this gene include?nucleic acid binding?and?hydrolase activity.?
CDR2L	23.4657	31.6752	0.02325																											V	Unknown	Among its related pathways are?Metabolism?and?Peroxisome. Gene Ontology (GO) annotations related to this gene include?signaling receptor binding?and?2,4-dienoyl-CoA reductase (NADPH) activity.?
CEBPB	2.02708	5.91481	0.00846																V												Immunology	Among its related pathways are?Vesicle-mediated transport?and?RAB GEFs exchange GTP for GDP on RABs. Gene Ontology (GO) annotations related to this gene include?Rab guanyl-nucleotide exchange factor activity.?
CEP250	13.1817	17.6267	0.00891	V																											Cell proliferation	Among its related pathways are?Vesicle-mediated transport?and?RAB GEFs exchange GTP for GDP on RABs. Gene Ontology (GO) annotations related to this gene include?Rab guanyl-nucleotide exchange factor activity.?
CFAP126	4.14652	2.66387	0.04949																											V	Unknown	Among its related pathways are Innate Immune System and triacylglycerol biosynthesis. Gene Ontology (GO) annotations related to this gene include transferase activity, transferring phosphorus-containing groups and 2-acylglycerol O-acyltransferase activity.
CFI	0.74922	0.44888	0.04226																V												Immunology	Among its related pathways are Glycerolipid metabolism and Response to elevated platelet cytosolic Ca2+. Gene Ontology (GO) annotations related to this gene include kinase binding and phospholipase binding.
CHD3	23.7235	31.649	0.03216																V												Immunology	Gene Ontology (GO) annotations related to this gene include?oxidoreductase activity?and?coenzyme binding.
CHRAC1	48.6195	43.5713	0.02936	V																											Cell proliferation	Among its related pathways are?Innate Immune System?and?AGE	RAGE pathway. Gene Ontology (GO) annotations related to this gene include?nucleotide binding.
CHSY1	19.3885	12.469	0.01471			V																									Carbon hydrate	Among its related pathways are?Preimplantation Embryo?and?Sudden Infant Death Syndrome (SIDS) Susceptibility Pathways. Gene Ontology (GO) annotations related to this gene include?DNA-binding transcription factor activity?and?chromatin binding.?
CLCF1	0.01994	0.40613	0.03307																V												Immunology	Among its related pathways are?Butanoate metabolism?and?Metabolism. Gene Ontology (GO) annotations related to this gene include?oxidoreductase activity?and?2-hydroxyglutarate dehydrogenase activity.?
CLEC4E	0.16826	0.98847	0.01715																V												Immunology	May play an immune role by eliminating harmful DNA released into the extracellular environment by damaged epidermal cells.	Gene Ontology (GO) annotations related to this gene include?calcium ion binding?and?deoxyribonuclease activity.?
CLUH	38.7986	50.2708	0.04924																								V				Protein expression	The exact function of this gene is not known but studies in rat suggest a role in cellular proliferation and c-Myc-mediated transformation.	Gene Ontology (GO) annotations related to this gene include protein homodimerization activity and deoxyribonucleoside 5'-monophosphate N-glycosidase activity.
CMAS	135.276	99.9716	0.00744			V							V																		Carbon hydrate	Protein metabolism	Among its related pathways are Metabolism of proteins and Post-translational modification- synthesis of GPI-anchored proteins. Gene Ontology (GO) annotations related to this gene include glycosyltransferase activity and dolichyl-phosphate-mannose-protein mannosyltransferase activity.
CMTR1	30.2153	37.3129	0.01699																								V				Posttranscription modofication	Among its related pathways are?Innate Immune System. Gene Ontology (GO) annotations related to this gene include?serine-type peptidase activity?and?dipeptidyl-peptidase activity.?
CNOT7	34.1636	74.0322	0.0006	V																											Cell proliferation	Among its related pathways are Purine metabolism and Pyrimidine metabolism. Gene Ontology (GO) annotations related to this gene include RNA binding and magnesium ion binding.
COL2A1	4.48348	0.7727	0.01173	V																											Cell proliferation	Among its related pathways are Golgi-to-ER retrograde transport and Regulation of PLK1 Activity at G2/M Transition. Gene Ontology (GO) annotations related to this gene include RNA binding and microtubule motor activity.
COL9A2	0.87782	0.33531	0.00106																	V											Metastasis	Among its related pathways are CCR5 Pathway in Macrophages and Longevity regulating pathway. Gene Ontology (GO) annotations related to this gene include nucleotide binding and phosphorus-oxygen lyase activity. An
CORO1C	84.973	113.777	0.04209	V																											Cell proliferation
CPEB1	9.00606	13.7936	0.01815	V																											Cell proliferation
CPNE8	0.51455	1.76132	0.01603																V												Immunology	Controls spontaneous apoptosis through the regulation of BCL2L1 abundance.	Gene Ontology (GO) annotations related to this gene include?calcium ion binding.?
CPSF4	24.2073	31.7692	0.00377																				V	V	V						RNA splicing	Among its related pathways are HIF-1-alpha transcription factor network and Photodynamic therapy-induced HIF-1 survival signaling.	Gene Ontology (GO) annotations related to this gene include enzyme binding and iron ion binding.
CTSB	109.258	208.543	0.04068																V												Immunology	Among its related pathways are?Response to elevated platelet cytosolic Ca2+?and?Cholesterol and Sphingolipids transport	Recycling to plasma membrane in lung (normal and CF). Gene Ontology (GO) annotations related to this gene include?nucleic acid binding?and?GTP binding.?
CTSL	80.2607	133.93	0.01131																V												Immunology	Among its related pathways are?RNA transport. Gene Ontology (GO) annotations related to this gene include?translation initiation factor activity.?
CTSS	8.5413	33.6524	0.04352																V												Immunology	Gene Ontology (GO) annotations related to this gene include?RNA binding?and?translation initiation factor activity.
CUL7	44.4141	58.2988	0.0305										V																		Protein metabolism
CXCL13	0.38184	0.11681	0.02143																V												Immunology	Angiogenesis	May be responsible for anchoring smooth muscle cells to elastic fibers, and may be involved not only in the formation of the elastic fiber, but also in the processes that regulate vessel assembly. Has cell adhesive capacity.
DAPK2	0.11765	0.35605	0.03412															V													Apoptosis	Modulates the assembly and organization of the microtubule cytoskeleton, and probably plays a role in regulating the orientation of the mitotic spindle and the orientation of the plane of cell division.	Gene Ontology (GO) annotations related to this gene include?calcium ion binding?and?tubulin binding.?
DCAF11	13.0369	23.37	0.02306																											V	Unknown	Among its related pathways are?MAPK-Erk Pathway?and?GPCR Pathway. Gene Ontology (GO) annotations related to this gene include?transferase activity, transferring phosphorus-containing groups?and?protein tyrosine kinase activity.
DDX42	54.6456	66.1085	0.01487																				V	V							DNA.Binding	Among its related pathways are MAPK-Erk Pathway and GPCR Pathway. Gene Ontology (GO) annotations related to this gene include transferase activity, transferring phosphorus-containing groups and protein tyrosine kinase activity.
DDX60	0.30142	0.62662	0.04952																											V	Unknown	Cell growth	Among its related pathways are?Beta-Adrenergic Signaling?and?Hematopoietic Stem Cell Differentiation. Gene Ontology (GO) annotations related to this gene include?hormone activity?and?erythropoietin receptor binding.
DECR2	11.4357	13.8204	0.01705																V												Immunology	Among its related pathways are Transcriptional misregulation in cancer and IL12 signaling mediated by STAT4. Gene Ontology (GO) annotations related to this gene include DNA-binding transcription factor activity and transcription regulatory region DNA binding.
DENND2A	18.7986	13.7431	0.04879																									V			Transport	Required for granulocyte differentiation and functionality of hematopoietic progenitor cells through the control of cell cycle progression and survival of hematopoietic progenitor cells.
DENND2C	2.47376	1.85497	0.0128																									V			Protein transport	Nuclear.Activity	Gene Ontology (GO) annotations related to this gene include?protein homodimerization activity?and?single-stranded DNA 3'-5' exodeoxyribonuclease activity.
DGAT1	24.4761	33.956	0.03053					V																							Glycerolipids metabolism	Among its related pathways are Amino Acid metabolism and Histidine, lysine, phenylalanine, tyrosine, proline and tryptophan catabolism. Gene Ontology (GO) annotations related to this gene include fumarylacetoacetase activity.
DGKQ	2.37919	4.96151	0.00889																		V										Cell signaling
DHRS13	14.522	12.477	0.04329																											V	Unknown	May negatively regulate RAC1 signaling and RAC1-driven cytoskeletal remodeling (Probable). May regulate chemotaxis, cell migration and epithelial polarization by controlling the polarity, plasticity,
DIAPH1	12.8235	17.4095	0.00352																V												Immunology	Knockdown of this gene also inhibited lung carcinogenesis and tumor cell growth.
DLX2	0.31674	0.10884	0.02355																							V					Neuron	Among its related pathways are?Class I MHC mediated antigen processing and presentation?and?Innate Immune System. Gene Ontology (GO) annotations related to this gene include?ubiquitin-protein transferase activity.?
DNAJC22	19.0372	27.1752	0.04964																											V	Metabolism	Nucleotide metabolism	Gene Ontology (GO) annotations related to this gene include transferase activity.	This constitutes the second step in the formation of the ribose 5-phosphate tandem repeat which links the phosphorylated O-mannosyl trisaccharide to the ligand binding moiety composed of repeats of 3-xylosyl-alpha-1,3-glucuronic acid-beta-1 (PubMed:25279699, PubMed:26923585, PubMed:29477842).
DNASE1L2	0.69303	1.48221	0.04096																V												Immunology	Among its related pathways are?Cytoskeletal Signaling. Gene Ontology (GO) annotations related to this gene include?actin binding.?
DNPH1	101.502	88.4582	0.01471	V																											Cell proliferation	Among its related pathways are?Beta-Adrenergic Signaling?and?SALM protein interactions at the synapses. Gene Ontology (GO) annotations related to this gene include?protease binding?and?ionotropic glutamate receptor binding.?
DPM1	26.0586	19.0719	0.02753			V							V																		Carbon hydrate	Among its related pathways are RANK Signaling in Osteoclasts and Prolactin Signaling Pathway. Gene Ontology (GO) annotations related to this gene include DNA-binding transcription factor activity and transcription factor binding.
DPP7	30.4767	47.9466	0.03752																V												Immunology	Among its related pathways are?Notch Signaling Pathway?and?Transcriptional activity of SMAD2	SMAD3-SMAD4 heterotrimer. Gene Ontology (GO) annotations related to this gene include?serine-type endopeptidase activity?and?serine-type endopeptidase inhibitor activity.
DUT	95.2719	85.3355	0.03817												V												V				Nucleotide metabolism	Among its related pathways are Wnt / Hedgehog / Notch. Gene Ontology (GO) annotations related to this gene include fucosyltransferase activity and alpha-(1->3)-fucosyltransferase activity.
DYNC1H1	68.2118	90.7758	0.01126												V																Nucleotide metabolism	Among its related pathways are Interferon gamma signaling and Cytokine Signaling in Immune system.	Gene Ontology (GO) annotations related to this gene include GTP binding and GTPase activity.
DZANK1	0.71986	0.50079	0.03309																											V	Unknown	Gene Ontology (GO) annotations related to this gene include?GTP binding?and?magnesium ion binding.?
EEPD1	0.03633	0.29475	0.02705																											V	Unknown	Nuclear.Activity	?Among its related pathways are?Resolution of D-loop Structures through Holliday Junction Intermediates?and?DNA Double-Strand Break Repair. Gene Ontology (GO) annotations related to this gene include?nuclease activity?and?crossover junction endodeoxyribonuclease activity.?
EFHD2	26.1395	37.9492	0.03853																V												Immunology	Aberrant expression of the GGTA1 protein in man can lead to autoimmune diseases
EGLN1	109.85	87.6136	0.04079	V																											Cell proliferation	Among its related pathways are?NF-kappaB Signaling?and?Apoptosis and Autophagy. Gene Ontology (GO) annotations related to this gene include?GTP binding.?
EHD3	41.2052	33.1926	0.04697		V																										Angiogenesis	Essential for VEGF signaling through the activation of phospholipase C-gamma and ERK1	2, hence may control endothelial cell proliferation and angiogenesis	Among its related pathways are?EPH-Ephrin signaling?and?Paxillin-dependent events mediated by a4b1. Gene Ontology (GO) annotations related to this gene include?GTPase activator activity.?
EIF1B	97.5949	75.6698	0.03063																								V				Protein expression	Among its related pathways are?Glycerolipid metabolism?and?Innate Immune System. Gene Ontology (GO) annotations related to this gene include?protein homodimerization activity?and?hydrolase activity.
EIF2D	45.4245	40.7383	0.01914																								V				Protein expression	Nucleotide metabolism	Among its related pathways are Amino Acid metabolism and Neuroscience. Gene Ontology (GO) annotations related to this gene include identical protein binding and oxidoreductase activity.	It is allosterically activated by ADP and inhibited by GTP and ATP.
EMC1	13.4785	17.2381	0.04902																											V	Unknown	Among its related pathways are?Platelet homeostasis?and?CCR5 Pathway in Macrophages. Gene Ontology (GO) annotations related to this gene include?GTPase activity?and?spectrin binding.
EMILIN2	0.62374	2.23061	0.00926		V															V											Cell migration	Plays an essential role in leukocyte migration. Among its related pathways are Innate Immune System and Presynaptic function of Kainate receptors. Gene Ontology (GO) annotations related to this gene include G protein-coupled receptor activity and transmembrane signaling receptor activity.
EML1	0.18317	0.38424	0.03874	V																											Cell proliferation	Among its related pathways are?Platelet homeostasis?and?CCR5 Pathway in Macrophages. Gene Ontology (GO) annotations related to this gene include?obsolete signal transducer activity?and?G-protein beta-subunit binding.
EPHB1	0.02484	0.15017	0.00807																							V					Neuron	Involved in transcriptional regulation. It is able to activate transcription from the CXCR4 promoter	Gene Ontology (GO) annotations related to this gene include?nucleic acid binding.
EPHB6	0.33483	1.34467	0.00131																V												Immunology	Among its related pathways are?GPCR Pathway?and?PAK Pathway. Gene Ontology (GO) annotations related to this gene include?heparan sulfate proteoglycan binding.?
EPO	5.32708	6.65545	0.00389	V	V																										Angiogenesis	metastasis
ETV5	40.9436	21.6728	0.02653	V																											Cell proliferation	Gene Ontology (GO) annotations related to this gene include?G protein-coupled receptor activity.?
EVI2B	0.71078	1.96602	0.03414																V												Immunology
EXO5	10.9087	9.23605	0.0226																			V							V		DNA repair	Among its related pathways are?Lipoprotein metabolism?and?Metabolism.
FAH	26.8399	22.2994	0.01453									V																			Amino acid metabolism	Among its related pathways are Innate Immune System and Integrated Breast Cancer Pathway. Gene Ontology (GO) annotations related to this gene include growth factor activity.
FAM219A	11.7089	17.9829	0.04638																											V	Unknown	Among its related pathways are Metapathway biotransformation and Glutathione metabolism. Gene Ontology (GO) annotations related to this gene include protein homodimerization activity and glutathione peroxidase activity.
FAM49A	20.0766	17.5446	0.04009																	V											Metastasis	Sterols metabolism	Amino acid metabolism	Vitemin metabolism	Nuclear.Activity	Transpot	Among its related pathways are Metapathway biotransformation and Amino Acid metabolism. Gene Ontology (GO) annotations related to this gene include oxidoreductase activity and retinol binding.	Catalyzes the NAD-dependent oxidation of all-trans-retinol, alcohol, and omega-hydroxy fatty acids and their derivatives (PubMed:15369820, PubMed:16787387, PubMed:9600267). Oxidizes preferentially all trans-retinol, all-trans-4-hydroxyretinol, 9-cis-retinol, 2-hexenol, and long chain omega-hydroxy fatty acids such as juniperic acid (PubMed:15369820, PubMed:16787387, PubMed:9600267).
FAM57A	39.7905	30.7372	0.02981	V																											Cell growth	Among its related pathways are?Tat-mediated elongation of the HIV-1 transcript?and?mRNA Splicing - Major Pathway. Gene Ontology (GO) annotations related to this gene include?helicase activity?and?ATP-dependent helicase activity.
FBXL14	40.767	34.5769	0.01911																V												Immunology	Among its related pathways are?Response to elevated platelet cytosolic Ca2+. Gene Ontology (GO) annotations related to this gene include?GTP binding?and?GTPase activity.
FKRP	15.7037	19.9242	0.02165			V									V																Carbon hydrate	Among its related pathways are?G-Beta Gamma Signaling?and?Metabolism of nucleotides. Gene Ontology (GO) annotations related to this gene include?protein homodimerization activity?and?protein kinase activity. A
FLII	39.0287	51.1553	0.01576																		V										Cell signaling	Among its related pathways are?Malaria?and?Cell surface interactions at the vascular wall.
FLOT1	9.71491	14.6981	0.00355																		V										Cell signaling	its related pathways are Activated PKN1 stimulates transcription of AR (androgen receptor) regulated genes KLK2 and KLK3 and UVA-Induced MAPK Signaling.
FOS	45.815	24.4443	0.006	V																											Cell proliferation	Among its related pathways are Histidine, lysine, phenylalanine, tyrosine, proline and tryptophan catabolism and Tryptophan metabolism. Gene Ontology (GO) annotations related to this gene include iron ion binding and oxygen binding.
FURIN	15.3455	22.4774	0.04285																V												Immunology	Fatty acid metabolism	Among its related pathways are Amino Acid metabolism and Mitochondrial LC-Fatty Acid Beta-Oxidation. Gene Ontology (GO) annotations related to this gene include oxidoreductase activity and NAD binding.
FUT4	0.09952	0.35822	0.02067			V																									Carbon hydrate	Cell proliferation	Among its related pathways are ERK Signaling and ECM proteoglycans. Gene Ontology (GO) annotations related to this gene include extracellular matrix structural constituent and hyaluronic acid binding.
GBP7	2.09548	7.00623	0.00263																V												Immunology	Among its related pathways are Signaling by GPCR and Peptide ligand-binding receptors. Gene Ontology (GO) annotations related to this gene include G protein-coupled receptor activity.
GEM	1.60808	2.60552	0.01138																		V										Cell signaling	Plays a role in antigen receptor signaling for both clonal expansion and deletion in lymphoid cells.	Among its related pathways are?Proteoglycans in cancer?and?NF-kappaB Signaling. Gene Ontology (GO) annotations related to this gene include?protein kinase binding.?
GEN1	17.0978	13.9677	0.02712																			V							V		DNA repair	Among its related pathways are?Potassium Channels?and?Sweet Taste Signaling. Gene Ontology (GO) annotations related to this gene include?ion channel activity?and?cAMP binding.?
GGTA1	1.10681	3.7489	0.01146																V												Immunology	Among its related pathways are?Transcriptional misregulation in cancer?and?Mesodermal Commitment Pathway. Gene Ontology (GO) annotations related to this gene include?DNA-binding transcription factor activity?and?sequence-specific DNA binding.
GIMAP5	0.15015	0.74685	0.01306																V												Immunology	The encoded protein is localized to the cell membrane and has been linked to tumorigenesis and the progression of pituitary adenomas.?
GIT1	59.6595	75.2818	0.00069		V																										Angiogenesis	Gene Ontology (GO) annotations related to this gene include?nucleosomal DNA binding.
GLA	8.21254	11.9832	0.03733																V												Immunology	Negatively regulates T cell activation by inhibiting the calcineurin-NFAT pathway.	Among its related pathways are?Protein-protein interactions at synapses?and?Circadian entrainment. Gene Ontology (GO) annotations related to this gene include?protein domain specific binding?and?G protein-coupled glutamate receptor binding.
GLUD1	57.8851	81.9029	0.03084									V			V																Amino acid metabolism	Among its related pathways are?CCR5 Pathway in Macrophages?and?EGFR Transactivation by Gastrin. Gene Ontology (GO) annotations related to this gene include?GTP binding?and?protein C-terminus binding.?
GNB3	0.2669	0.53401	0.02887																V												Immunology	Mineral metabolism	Among its related pathways are Proteolysis Role of Parkin in the Ubiquitin-Proteasomal Pathway and Metabolism of proteins. Gene Ontology (GO) annotations related to this gene include calcium ion binding and ubiquitin protein ligase binding.
GNG2	10.149	6.70792	0.02905																V												Immunology	Nucleotide metabolism	Among its related pathways are Glycosaminoglycan metabolism and Metabolism. Gene Ontology (GO) annotations related to this gene include enzyme binding and virus receptor activity.
GPATCH3	4.15379	5.34064	0.03476																V												Immunology	Among its related pathways are Transcriptional misregulation in cancer and Dendritic Cells Developmental Lineage Pathway.	Gene Ontology (GO) annotations related to this gene include protein dimerization activity and ion channel binding.
GPC6	5.76497	3.13099	0.00035	V																											Cell proliferation	Promotes cell motility, seems to stimulate tumor metastasis?
GPNMB	1829.95	2760.65	0.011	V																V											Suppression for tumor growth	The protein encoded by this gene is a preprohormone which is cleaved to form two biologically active peptides, adrenomedullin and proadrenomedullin N-terminal 20 peptide. Adrenomedullin is a 52 aa peptide with several functions, including vasodilation, regulation of hormone secretion, promotion of angiogenesis, and antimicrobial activity.	Among its related pathways are Sympathetic Nerve Pathway (Neuroeffector Junction) and Peptide ligand-binding receptors. Gene Ontology (GO) annotations related to this gene include signaling receptor binding and adrenomedullin receptor binding. A
GPR141	0.05285	0.27625	0.04248																											V	Unknown
GPR34	0.03608	0.22101	0.02375																											V	UnknownAmong its related pathways are?Peptide ligand-binding receptors. Gene Ontology (GO) annotations related to this gene include?G protein-coupled receptor activity?and?G protein-coupled purinergic nucleotide receptor activity.?
GRINA	87.757	122.519	0.04114																											V	Metabolism	Among its related pathways are?Jak-Stat Signaling Pathway (sino)?and?Longevity regulating pathway. Gene Ontology (GO) annotations related to this gene include?identical protein binding?and?protein kinase activity.
GRN	100.739	156.512	0.0191																V												Immunology	Among its related pathways are?Cell adhesion molecules.?
GSTZ1	36.4713	29.3371	0.01289									V																			Amino acid metabolism	The protein encoded by this gene is an immunoglobulin-like membrane protein containing several V-type Ig-like domains.
GTF2F2	39.8874	49.8384	0.00686																			V									Nuclear.Activity	Interferon-gamma, tumor necrosis factor-alpha and interleukin 1, beta (IL1B) are reported to stimulate the expression of this cytokine in keratinocytes.?	Among its related pathways are Cytokine Signaling in Immune system and PEDF Induced Signaling. Gene Ontology (GO) annotations related to this gene include cytokine activity and interleukin-1 receptor binding.
GTPBP2	38.7202	55.9406	0.03682																		V										Cell signaling	This receptor transduces the growth promoting signal of IL21, and is important for the proliferation and differentiation of T cells, B cells, and natural killer (NK) cells.	Among its related pathways are?Jak-Stat Signaling Pathway (sino)?and?Th17 cell differentiation. Gene Ontology (GO) annotations related to this gene include?interleukin-21 receptor activity.?
GUCY2F	0.48575	0.32999	0.0426																		V										Cell signaling	Among its related pathways are superpathway of D-myo-inositol (1,4,5)-trisphosphate metabolism and PI Metabolism. Gene Ontology (GO) annotations related to this gene include phosphoric ester hydrolase activity.
GYPC	7.63455	10.5482	0.03929																											V	Unknown	Among its related pathways are Regulation of cholesterol biosynthesis by SREBP (SREBF) and Sterol Regulatory Element-Binding Proteins (SREBP) signalling.	Oxysterol-binding protein that mediates feedback control of cholesterol synthesis by controlling both endoplasmic reticulum to Golgi transport of SCAP and degradation of HMGCR (PubMed:12202038, PubMed:12535518, PubMed:16168377, PubMed:16399501, PubMed:16606821, PubMed:32322062).Acts as a negative regulator of cholesterol biosynthesis by mediating the retention of the SCAP-SREBP complex in the end…
H3F3A	302.34	251.274	0.03543																			V									Nuclear.Activity	Among its related pathways are?Prolactin Signaling Pathway?and?Immune response IFN alpha	beta signaling pathway. Gene Ontology (GO) annotations related to this gene include?DNA-binding transcription factor activity?and?RNA polymerase II proximal promoter sequence-specific DNA binding.?
HAAO	3.46668	1.34722	0.01688									V																			Amino acid metabolism	Among its related pathways are Immune response IFN alpha	beta signaling pathway and Interferon gamma signaling. Gene Ontology (GO) annotations related to this gene include DNA-binding transcription factor activity.
HADH	62.022	54.2576	0.0148				V												V												Immunology	Among its related pathways are?MAPK-Erk Pathway?and?Dendritic Cells Developmental Lineage Pathway.
HAPLN1	33.6045	7.11901	0.0043	V																											Metastasis	Among its related pathways are Peptide ligand-binding receptors and Activation of TRKA receptors. Gene Ontology (GO) annotations related to this gene include G protein-coupled receptor activity and protein heterodimerization activity.
HCAR1	2.37883	1.21995	0.02356			V																									Carbon hydrate	Among its related pathways are?MAPK-Erk Pathway?and?Cell Cycle, Mitotic. Gene Ontology (GO) annotations related to this gene include?obsolete signal transducer activity?and?protein C-terminus binding.
HCLS1	2.63284	4.1226	0.03116																V												Immunology	Among its related pathways are Thiopurine Pathway, Pharmacokinetics/Pharmacodynamics and Purine metabolism. Gene Ontology (GO) annotations related to this gene include nucleotide binding and nucleoside-triphosphate diphosphatase activity.
HCN3	0.80028	0.52419	0.01805																											V	Unknown	Among its related pathways are superpathway of inositol phosphate compounds and Inositol phosphate metabolism. Gene Ontology (GO) annotations related to this gene include calmodulin binding and inositol-1,4,5-trisphosphate 3-kinase activity.
HHEX	0.2318	0.73133	0.01411	V																											Cell proliferation	Among its related pathways are?Platelet homeostasis?and?DAG and IP3 signaling. Gene Ontology (GO) annotations related to this gene include?ion channel activity?and?calcium channel activity.?
HIGD1B	0.12112	0.41973	0.04683	V																											Cell proliferation	Among its related pathways are?Chromatin organization?and?Activated PKN1 stimulates transcription of AR (androgen receptor) regulated genes KLK2 and KLK3. Gene Ontology (GO) annotations related to this gene include?rRNA binding?and?histone demethylase activity.
HMGN5	32.691	27.1268	0.03683																				V								DNA.Binding	Among its related pathways are?Vesicle-mediated transport?and?Response to elevated platelet cytosolic Ca2+. Gene Ontology (GO) annotations related to this gene include?ATPase activity?and?Rab GTPase binding.?
HOMER3	21.8595	29.3826	0.01291																V												Immunology	Among its related pathways are?Circadian rythm related genes?and?Diurnally Regulated Genes with Circadian Orthologs. Gene Ontology (GO) annotations related to this gene include?DNA-binding transcription factor activity.?
HRAS	45.5481	40.0483	0.03282	V																											Cell proliferation
HSPA5	564.464	755.796	0.04763										V				V	V													Protein metabolism	Among its related pathways are?RHO GTPases activate KTN1?and?Actin Nucleation by ARP-WASP Complex. Gene Ontology (GO) annotations related to this gene include?kinesin binding.
HYAL2	18.8762	15.4849	0.00433			V									V																Carbon hydrate	Among its related pathways are Pyruvate metabolism and Citric Acid (TCA) cycle and Metabolism. Gene Ontology (GO) annotations related to this gene include oxidoreductase activity and 2-hydroxyglutarate dehydrogenase activity.
ID2	129.821	107.5	0.01062																			V									Nuclear.Activity	Among its related pathways are?Small cell lung cancer?and?MET promotes cell motility. Gene Ontology (GO) annotations related to this gene include?protein tyrosine kinase activity?and?obsolete signal transducer activity.?
IER2	33.0648	27.0375	0.04319																	V											Metastasis	a transcriptional repressor	this gene include DNA-binding transcription factor activity and calmodulin binding
IER5L	0.63867	1.01362	0.02904																											V	Unknown	Among its related pathways are Translational Control.	Gene Ontology (GO) annotations related to this gene include translation initiation factor binding.
IGDCC4	0.11867	0.25775	0.04313																											V	Unknown	Amino acid metabolism	Nucleotide metabolism	Among its related pathways are Amino Acid metabolism and tRNA Aminoacylation. Gene Ontology (GO) annotations related to this gene include nucleotide binding and aminoacyl-tRNA editing activity.		this gene include proton transmembrane transporter activity.
IGF1R	6.79388	4.56339	0.03945	V																											Cell proliferation	Transcriptional activator which may act in mitogen-activated protein kinase signaling pathway.
IGSF11	16.0306	22.1468	0.03825																											V	Unknown	Serine lipid hydrolase associated with lipid droplets. Highly expressed in macrophage-rich areas in atherosclerotic lesions, suggesting that it could promote cholesterol ester turnover in macrophages.
IGSF3	38.6943	25.9963	0.02772																											V	unknown	Among its related pathways are Response to elevated platelet cytosolic Ca2+.
IL1F9	0.09699	0.21153	0.01828																V												Immunology	Among its related pathways are?Osteoclast differentiation?and?Innate Immune System.?
IL21R	0.1154	0.44939	0.00432																V												Immunology
INPP5F	25.6041	42.8487	0.03988						V																						Phospholipid metabolism	Among its related pathways are Lipoprotein metabolism and Metabolism.
INSIG1	250.313	210.103	0.04282	V							V																				Sterols metabolism	Among its related pathways are Lipoprotein metabolism and Metabolism.
IRF1	9.34929	15.0194	0.02179																V												Immunology	the encoded protein may regulate transcription by competitively binding to specific DNA-binding transcription factors.	Diseases associated with LMO1 include T-Cell Acute Lymphoblastic Leukemia and Neuroblastoma.
IRF9	4.43118	10.36	0.00625																V												Immunology	The encoded protein may play a role as a transcriptional regulator or as an oncogene.	Among its related pathways are?Embryonic and Induced Pluripotent Stem Cells and Lineage-specific Markers?and?IL6-mediated signaling events. Gene Ontology (GO) annotations related to this gene include?DNA-binding transcription factor activity?and?enhancer sequence-specific DNA binding.?
ITGAX	0.19595	0.63079	0.04463																V												Immunology	Among its related pathways are Respiratory electron transport, ATP synthesis by chemiosmotic coupling, and heat production by uncoupling proteins. and Gene Expression. Gene Ontology (GO) annotations related to this gene include RNA binding and ubiquitin protein ligase binding.
ITGB3BP	29.0107	20.2934	0.04625															V													Apoptosis	Among its related pathways are?Class I MHC mediated antigen processing and presentation?and?Innate Immune System. Gene Ontology (GO) annotations related to this gene include?isomerase activity.
ITPA	92.2353	82.7548	0.0281												V																Nucleotide metabolism
ITPKB	31.1455	24.7031	0.01224						V																						Phospholipid metabolism	Among its related pathways are Cell adhesion molecules. Gene Ontology (GO) annotations related to this gene include signaling receptor binding.
ITPR1	3.95535	2.79717	0.02308																		V										Cell signaling	Among its related pathways are?Parkinsons Disease Pathway?and?Pathways of neurodegeneration - multiple diseases. Gene Ontology (GO) annotations related to this gene include?protein homodimerization activity?and?transferase activity, transferring phosphorus-containing groups.?
KDM2B	12.9816	10.5678	0.04559																					V							RNA.Binding	Gene expression	Among its related pathways are mRNA Splicing - Major Pathway and Gene Expression. Gene Ontology (GO) annotations related to this gene include RNA binding.
KIF16B	15.8575	20.3365	0.01914																									V			Protein transport	Among its related pathways are Regulation of cholesterol biosynthesis by SREBP (SREBF) and cholesterol biosynthesis II (via 24,25-dihydrolanosterol). Gene Ontology (GO) annotations related to this gene include intramolecular transferase activity and lanosterol synthase activity.	The encoded protein is a member of the terpene cyclase/mutase family and catalyzes the first step in the biosynthesis of cholesterol, steroid hormones, and vitamin D.
KLF9	6.43164	8.97977	0.02901																				V								DNA.Binding	Among its related pathways are?TRAF Pathway?and?Cytokine Signaling in Immune system. Gene Ontology (GO) annotations related to this gene include?signaling receptor binding?and?tumor necrosis factor receptor binding.?
KRI1	27.6296	34.3186	0.0114																											V	Unknown	Among its related pathways are?GPCR Pathway?and?PAK Pathway. Gene Ontology (GO) annotations related to this gene include?calcium ion binding?and?transforming growth factor beta binding.?
KTN1	31.144	46.1928	0.00868																								V				Protein expression
L2HGDH	19.1691	16.8765	0.02098											V																	TCA cycle	Among its related pathways are?Transcription_NF-kB signaling pathway?and?Activated TLR4 signalling. Gene Ontology (GO) annotations related to this gene include?coreceptor activity?and?lipopolysaccharide receptor activity.
LAMA4	30.1967	40.5407	0.04227																	V											Metastasis	Gene Ontology (GO) annotations related to this gene include?tubulin binding?and?metallocarboxypeptidase activity.
LARP1	100.378	118.581	0.02525																								V				Protein expression	Among its related pathways are?CCR5 Pathway in Macrophages?and?RhoGDI Pathway. Gene Ontology (GO) annotations related to this gene include?transferase activity, transferring phosphorus-containing groups?and?protein tyrosine kinase activity.?
LARS2	427.52	174.993	0.01693									V			V				V												Immunology	Plays a role in autocrine regulation of cell growth mediated by growth regulators containing cell surface retention sequence binding (CRS).	Among its related pathways are?Cell adhesion_Cell-matrix glycoconjugates?and?Glycosaminoglycan metabolism. Gene Ontology (GO) annotations related to this gene include?hyaluronic acid binding.?
LBH	250.669	205.624	0.02503	V																											Cell proliferation	Among its related pathways are Organelle biogenesis and maintenance and Cargo trafficking to the periciliary membrane. Gene Ontology (GO) annotations related to this gene include identical protein binding.
LDAH	43.0143	37.8172	0.03457								V																				Sterols metabolism	?Among its related pathways are?Response to elevated platelet cytosolic Ca2+?and?Factors involved in megakaryocyte development and platelet production. Gene Ontology (GO) annotations related to this gene include?DNA-binding transcription factor activity?and?transcription regulatory region sequence-specific DNA binding.
LHFPL2	4.98871	17.7742	0.02573																V												Immunology	Probably involved in the sorting and selective transport of receptors and ligands across polarized epithelia.?
LILRA6	0.02686	0.12991	0.00236																V												Immunology	Plays a role in apoptosis. Involved in the formation of microtubule bundles	Gene Ontology (GO) annotations related to this gene include?identical protein binding?and?actin filament binding.
LINS1	4.67708	6.82242	0.02296																											V	Unknown	Among its related pathways are?TCR Signaling (Qiagen)?and?4-1BB Pathway. Gene Ontology (GO) annotations related to this gene include?transferase activity, transferring phosphorus-containing groups?and?protein tyrosine kinase activity.?
LMF1	32.2168	27.5485	0.02951							V																					lipoproteins metabolism	Among its related pathways are?Integrated Breast Cancer Pathway.
LMF2	34.3363	41.042	0.02804							V																					lipoproteins metabolism	Among its related pathways are Acyl chain remodelling of PE and triacylglycerol biosynthesis. Gene Ontology (GO) annotations related to this gene include 1-acylglycerol-3-phosphate O-acyltransferase activity.
LMO1	30.6684	16.3544	0.02143	V																											Cell proliferation
LMO4	40.3049	30.6597	0.01422	V																											Cell proliferation	Among its related pathways are?Statin Pathway?and?Lipoprotein metabolism. Gene Ontology (GO) annotations related to this gene include?ligase activity?and?ubiquitin protein ligase activity.
LRPPRC	51.0595	64.164	0.00204												V																Nucleotide metabolism	Among its related pathways are?NAD metabolism?and?Metabolism. Gene Ontology (GO) annotations related to this gene include?NAD+ kinase activity.
LRR1	11.402	9.09616	0.02143																V												Immunology	Among its related pathways are?Innate Immune System?and?Yersinia infection. Gene Ontology (GO) annotations related to this gene include?actin binding.?
LRRC46	0.55648	1.00513	0.0371																											V	Unknown	Gene Ontology (GO) annotations related to this gene include?methyltransferase activity.?
LRRC4B	5.44299	2.18426	0.01938																	V											Cell migration	Among its related pathways are triacylglycerol biosynthesis and Fatty Acyl-CoA Biosynthesis. Gene Ontology (GO) annotations related to this gene include acyltransferase activity and 1-acylglycerol-3-phosphate O-acyltransferase activity.	This integral membrane protein converts lysophosphatidic acid to phosphatidic acid, the second step in de novo phospholipid biosynthesis.
LRRK2	1.49994	2.03979	0.00087																							V					Neuron growth	Nuclear.Activity	Gene Ontology (GO) annotations related to this gene include?single-stranded DNA exodeoxyribonuclease activity.
LSM5	150.045	133.254	0.00794																								V				Protein expression	Among its related pathways are Metabolism of proteins and Transport to the Golgi and subsequent modification.
LSS	41.8205	37.2985	0.03551								V					V															Sterols metabolism	Gene Ontology (GO) annotations related to this gene include identical protein binding and phosphatidic acid binding.
LTB	0.05316	0.39452	0.02942																V												Immunology	Among its related pathways are?Sertoli-Sertoli Cell Junction Dynamics?and?PI3K-Akt signaling pathway.?
LTBP3	18.2263	25.1802	0.04447																V												Immunology	Among its related pathways are Respiratory electron transport, ATP synthesis by chemiosmotic coupling, and heat production by uncoupling proteins. and purine nucleotides de novo biosynthesis. Gene Ontology (GO) annotations related to this gene include ATP hydrolysis activity and proton transmembrane transporter activity.
LURAP1L	0.09987	0.45196	0.02741																											V	unknown	Gene Ontology (GO) annotations related to this gene include?phosphatase activity.?
LY96	19.8415	16.2759	0.02175																V												Immunology	Among its related pathways are Sertoli-Sertoli Cell Junction Dynamics and PI Metabolism. Gene Ontology (GO) annotations related to this gene include protein homodimerization activity and protein tyrosine phosphatase activity.
LYN	3.31489	6.38606	0.0263																V												Immunology	Among its related pathways are Respiratory electron transport, ATP synthesis by chemiosmotic coupling, and heat production by uncoupling proteins. and Metabolism. Gene Ontology (GO) annotations related to this gene include NADH dehydrogenase (ubiquinone) activity.
LYVE1	0.91482	0.39093	0.01558	V																											Cell proliferation	Among its related pathways are?PI3K	AKT activation?and?EGFR Transactivation by Gastrin. Gene Ontology (GO) annotations related to this gene include?transferase activity, transferring phosphorus-containing groups?and?protein serine	threonine kinase activity.?
LZTFL1	8.63976	7.66847	0.00903																									V			Protein transport	Among its related pathways are Lipoprotein metabolism and Class I MHC mediated antigen processing and presentation. Gene Ontology (GO) annotations related to this gene include ligase activity and ubiquitin protein ligase activity.
MAFK	14.2191	18.6552	0.01769																				V								DNA.Binding	Among its related pathways are?RhoGDI Pathway?and?PAK Pathway. Gene Ontology (GO) annotations related to this gene include?signaling receptor binding?and?calmodulin binding.
MAMDC4	8.85947	10.8251	0.02038																									V			Protein transport	Among its related pathways are?RhoGDI Pathway?and?PAK Pathway. Gene Ontology (GO) annotations related to this gene include?protein homodimerization activity?and?GTPase activator activity.?
MAP1S	11.3426	16.5203	0.01888															V													Apoptosis	Gene Ontology (GO) annotations related to this gene include?enzyme binding.
MAP3K6	3.5368	5.34978	0.0016																V												Immunology
MAP3K7CL	0.70211	0.30681	0.0491	V																											Cell proliferation	Vitemin metabolism	Among its related pathways are Metabolism of water-soluble vitamins and cofactors and NAD metabolism. Gene Ontology (GO) annotations related to this gene include NAD+ kinase activity.
MBOAT2	57.8051	41.138	0.03499					V																							Glycerolipids metabolism	As part of the BORC complex may play a role in lysosomes movement and localization at the cell periphery.?
MED15	20.4953	26.8744	0.03541																					V							RNA.Binding	Among its related pathways are Statin Pathway and Lipoprotein metabolism. Gene Ontology (GO) annotations related to this gene include protein self-association.
MED31	12.9896	11.4985	0.00077																					V							RNA.Binding	The encoded protein may play a role in cell cycle progression from G2 to M phase.	Gene Ontology (GO) annotations related to this gene include?transferase activity, transferring phosphorus-containing groups?and?protein tyrosine kinase activity.
MED6	44.7736	39.1642	0.02317																					V							RNA.Binding
MEFV	0.01037	0.20971	0.03662																V												Immunology	This gene encodes a transmembrane protein that interacts with the beta subunit of a sodium	potassium-transporting ATPase.?
METTL25	8.80617	7.05398	0.01648																			V									Nuclear.Activity	Nucleotide metabolism	Among its related pathways are Purine metabolism and Synthesis and interconversion of nucleotide di- and triphosphates. Gene Ontology (GO) annotations related to this gene include protein-containing complex binding and nucleoside diphosphate kinase activity.
MGME1	14.6891	12.6137	0.04375																			V							V		DNA repair	NOL4L (Nucleolar Protein 4 Like) is a Protein Coding gene.
MIA3	98.9365	40.2296	0.00178										V																		Protein metabolism	Among its related pathways are?rRNA processing in the nucleus and cytosol?and?Gene Expression. Gene Ontology (GO) annotations related to this gene include?RNA binding?and?polynucleotide 5'-hydroxyl-kinase activity.
MICALL1	18.3515	25.8952	0.02861						V																						Phospholipid metabolism	Among its related pathways are?Platelet homeostasis?and?Prolactin Signaling Pathway. Gene Ontology (GO) annotations related to this gene include?protein homodimerization activity?and?oxidoreductase activity.?
MPP5	17.6571	15.7882	0.041	V																											Cell proliferation	RNA.Binding	DNA.Binding	Gene Ontology (GO) annotations related to this gene include?nucleic acid binding?and?RNA binding.?
MT-ATP6	14639.8	11953.9	0.00039												V																Nucleotide metabolism	Among its related pathways are?Organelle biogenesis and maintenance?and?Cargo trafficking to the periciliary membrane.?
MTMR10	24.5001	30.8621	0.02342																		V										Cell signaling	The protein encoded by this gene is related to the nuclear chaperone phosphoproteins, nucleoplasmin and nucleophosmin.?
MTMR2	80.7329	69.3458	0.03323						V																						Phospholipid metabolism	Among its related pathways are ECM-receptor interaction. Gene Ontology (GO) annotations related to this gene include calcium ion binding and integrin binding.
MT-ND4	5629.45	4807.54	0.00967												V																Nucleotide metabolism	Among its related pathways are?G-Beta Gamma Signaling?and?Cardiac conduction. Gene Ontology (GO) annotations related to this gene include?identical protein binding?and?protein kinase activity.?
MTOR	11.2723	15.5969	0.04803	V																											Cell proliferation	Among its related pathways are?Transcriptional misregulation in cancer?and?Proteoglycans in cancer. Gene Ontology (GO) annotations related to this gene include?serine-type endopeptidase activity.?
MYLIP	6.03044	8.5312	0.0381							V																					lipoproteins metabolism	Metastasis	Among its related pathways are Inositol phosphate metabolism and Metabolism. Gene Ontology (GO) annotations related to this gene include hydrolase activity and m7G(5')pppN diphosphatase activity.
MYO1C	35.9361	53.2557	0.01522																											V	Unknown	Nuclear GTPase found in germinal center B-cells, where it may inhibit function of the activation-induced cytidine deaminase AICDA	Gene Ontology (GO) annotations related to this gene include?GTP binding?and?GTPase activity.
MYO9B	15.3923	20.7404	0.0201																	V											Metastasis	Among its related pathways are Mesodermal Commitment Pathway.
N4BP2L2	14.5558	18.8164	0.03745																											V	Unknown	ODF3L1 (Outer Dense Fiber Of Sperm Tails 3 Like 1) is a Protein Coding gene.
N4BP3	10.7935	14.6713	0.04111																											V	Unknown	Plays an important role in development by regulating Wnt signaling and the specification of the left-right axis.	Among its related pathways are Organelle biogenesis and maintenance and Signaling by Hedgehog. Gene Ontology (GO) annotations related to this gene include alpha-tubulin binding and gamma-tubulin binding.
NADK	41.6024	51.8452	0.03635												V	V															Nucleotide metabolism	Among its related pathways are Valproic Acid Pathway, Pharmacodynamics and Amino Acid metabolism. Gene Ontology (GO) annotations related to this gene include chaperone binding and oxidoreductase activity, acting on the aldehyde or oxo group of donors, disulfide as acceptor.
NADK2	26.1653	21.3021	0.01634													V															Metabolism	Gene Ontology (GO) annotations related to this gene include?translation repressor activity, mRNA regulatory element binding.?
NAPA	83.1808	105.428	0.00661																							V					Metabolism	Among its related pathways are Cytoskeletal Signaling.	Gene Ontology (GO) annotations related to this gene include actin binding and muscle alpha-actinin binding.
NEK8	5.97296	8.58295	0.01723	V																											Cell proliferation	Among its related pathways are mRNA Splicing - Major Pathway and Processing of Capped Intronless Pre-mRNA. Gene Ontology (GO) annotations related to this gene include RNA binding and manganese ion binding. An
NGDN	42.8487	57.3132	0.02501																											V	unknown	Among its related pathways are?Axon guidance?and?G-protein signaling RAC1 in cellular process.
NKAIN2	0.04157	0.14891	0.03085																											V	Unknown	negatively regulates pro-inflammatory cytokine production in macrophages in response to IFNG stimulation	Among its related pathways are UVA-Induced MAPK Signaling and NAD metabolism. Gene Ontology (GO) annotations related to this gene include NAD+ ADP-ribosyltransferase activity.
NME4	22.617	17.5023	0.01111												V																Cell proliferation	mong its related pathways are Focal Adhesion. Gene Ontology (GO) annotations related to this gene include actin binding.
NOL4L	6.48256	2.27479	0.00794																											V	Unknown	Among its related pathways are?NF-kappaB Signaling?and?Apoptosis and Autophagy. Gene Ontology (GO) annotations related to this gene include?enzyme binding?and?transcription corepressor activity.
NOL9	19.9511	26.3244	0.00507																					V							RNA.Binding	Among its related pathways are?Mesodermal Commitment Pathway?and?Wnt	Hedgehog	Notch. Gene Ontology (GO) annotations related to this gene include?RNA polymerase II regulatory region sequence-specific DNA binding?and?DNA-binding transcription activator activity, RNA polymerase II-specific.
NOS2	0.17406	0.39057	0.02124																V												Immunology	Among its related pathways are?Transcriptional misregulation in cancer?and?Mesodermal Commitment Pathway. Gene Ontology (GO) annotations related to this gene include?DNA-binding transcription factor activity?and?sequence-specific DNA binding. A
NOVA1	2.44257	1.82906	0.00527																				V	V	V						RNA splicing	Gene Ontology (GO) annotations related to this gene include?hydrolase activity.
NPHP3	4.60087	3.81734	0.00926																									V			Protein transport	Among its related pathways are Lipoprotein metabolism and Neuroscience. Gene Ontology (GO) annotations related to this gene include RNA binding and protein self-association.
NPM3	79.0052	66.0534	0.00157																			V									Nuclear.Activity	RNA.Binding	Among its related pathways are?rRNA processing in the nucleus and cytosol?and?Gene Expression. Gene Ontology (GO) annotations related to this gene include?nucleic acid binding?and?transcription factor binding.
NPNT	17.3477	7.48146	0.02241																	V											Cell migration	Among its related pathways are Response to elevated platelet cytosolic Ca2+ and Innate Immune System. Gene Ontology (GO) annotations related to this gene include cysteine-type endopeptidase inhibitor activity and kinase inhibitor activity
NPR2	5.35653	8.6606	0.00552																		V										Cell signaling	Among its related pathways are?Proteoglycans in cancer?and?Apoptosis and Autophagy. Gene Ontology (GO) annotations related to this gene include?RNA binding?and?binding.
NR1I2	0.69833	0.33345	0.03031																				V								DNA.Binding	Cell signaling	Among its related pathways are Signaling by GPCR and DAG and IP3 signaling.	Gene Ontology (GO) annotations related to this gene include obsolete signal transducer activity and 3',5'-cyclic-AMP phosphodiesterase activity. A
NUDT4	41.577	54.7257	0.01691						V																						Phospholipid metabolism	Among its related pathways are DAG and IP3 signaling and Activation of cAMP-Dependent PKA. Gene Ontology (GO) annotations related to this gene include ion channel binding and protein kinase A binding.
NUGGC	0.54302	0.32427	0.03944																V												Immunology	Gene Ontology (GO) annotations related to this gene include?transcription coactivator activity.?
ODF3L1	25.2407	7.72494	0.02395																											V	Unknown	When overexpressed, induces the formation of cellular extension, such as filipodia in association with ACVRL1	Among its related pathways are?Validated targets of C-MYC transcriptional activation. Gene Ontology (GO) annotations related to this gene include?nucleic acid binding.?
OFD1	4.5923	6.06809	0.00688	V																											Cell proliferation	Immunology	Negatively regulates necroptosis by reducing RIPK3 expression	Among its related pathways are?NF-kappaB Signaling?and?Activated TLR4 signalling. Gene Ontology (GO) annotations related to this gene include?ligase activity?and?ubiquitin-protein transferase activity.?
OGDH	178.729	222.267	0.02253											V																	TCA cycle	CXCL4	Among its related pathways are Formation of Fibrin Clot (Clotting Cascade) and CCR5 Pathway in Macrophages.	Gene Ontology (GO) annotations related to this gene include heparin binding and CXCR3 chemokine receptor binding.
PAIP2B	47.7571	36.7118	0.02035																								V				Protein expression	Among its related pathways are Glycosaminoglycan metabolism and AMPK Enzyme Complex Pathway. Gene Ontology (GO) annotations related to this gene include 6-phosphofructo-2-kinase activity and fructose-2,6-bisphosphate 2-phosphatase activity.
PALLD	2.68778	8.45574	0.00379																	V											Cell migration	Among its related pathways are Lipoprotein metabolism and Cobalamin (Cbl, vitamin B12) transport and metabolism. Gene Ontology (GO) annotations related to this gene include signaling receptor binding.
PAPOLA	174.367	156.474	0.0301																								V				Protein expression	Gene Ontology (GO) annotations related to this gene include intramolecular transferase activity, phosphotransferases and glucose-1,6-bisphosphate synthase activity. Has only low phosphopentomutase and phosphoglucomutase activities.
PARD6B	4.56962	3.61136	0.02147																	V											Metastasis
PARP14	1.145	3.60617	0.01461																V												Immunolgy	MAPK Signaling: Mitogens and GPCR Pathway	this gene include estrogen receptor binding
PARVG	0.0421	0.29324	0.00193																	V											Metastasis	Among its related pathways are?Ion channel transport?and?Transport of glucose and other sugars, bile salts and organic acids, metal ions and amine compounds. Gene Ontology (GO) annotations related to this gene include?intracellular calcium activated chloride channel activity.
PAWR	13.5112	20.2554	0.02239															V													Apoptosis	Gene Ontology (GO) annotations related to this gene include enzyme binding.
PAX9	1.28528	2.02882	0.04285	V																											Cell growth	Among its related pathways are Post-translational modification- synthesis of GPI-anchored proteins and Metabolism of proteins.
PBX3	30.8284	22.0501	0.03284																				V								DNA.Binding	Among its related pathways are?CCR5 Pathway in Macrophages?and?Response to elevated platelet cytosolic Ca2+. Gene Ontology (GO) annotations related to this gene include?1-phosphatidylinositol-3-kinase regulator activity?and?phosphatidylinositol-4,5-bisphosphate 3-kinase activity.
PCED1B	0.06156	0.25502	0.0369																											V	Unknown	Among its related pathways are?PAK Pathway?and?Acyl chain remodelling of PE. Gene Ontology (GO) annotations related to this gene include?calcium ion binding?and?calcium-dependent phospholipase A2 activity.
PCSK9	5.80245	2.79457	0.04867							V																					lipoproteins metabolism	Among its related pathways are PAK Pathway and Acyl chain remodelling of PE. Gene Ontology (GO) annotations related to this gene include calcium ion binding and calcium-dependent phospholipase A2 activity.
PDCD11	26.5492	33.1539	0.04034																				V	V							DNA.Binding	Gene expression	Among its related pathways are Apoptotic Pathways in Synovial Fibroblasts and amb2 Integrin signaling. Gene Ontology (GO) annotations related to this gene include serine-type endopeptidase activity.
PDCD4	16.2193	12.436	0.00708															V													Apoptosis	Among its related pathways are?CCR5 Pathway in Macrophages?and?RhoGDI Pathway. Gene Ontology (GO) annotations related to this gene include?calcium ion binding?and?calmodulin binding.
PDE8A	8.35041	23.9795	0.02537	V																	V										Cell proliferation	Among its related pathways are?CCR5 Pathway in Macrophages?and?RhoGDI Pathway. Gene Ontology (GO) annotations related to this gene include?calcium ion binding?and?obsolete signal transducer activity.
PDLIM1	15.5444	22.4125	0.02222																			V									Nuclear.Activity	Diseases associated with PLEK include Aarskog-Scott Syndrome and Agammaglobulinemia, X-Linked.	Among its related pathways are Response to elevated platelet cytosolic Ca2+. Gene Ontology (GO) annotations related to this gene include protein homodimerization activity and phosphatidylinositol-3,4-bisphosphate binding.
PEG10	34.2881	25.4766	0.03286																	V											Metastasis	this gene include calcium ion binding and calcium-dependent phospholipid binding
PELI1	27.4575	22.5026	0.01924															V	V												Necroptosis	Among its related pathways are?PI Metabolism?and?Glycerophospholipid biosynthesis. Gene Ontology (GO) annotations related to this gene include?phosphatidylinositol-3-phosphate binding?and?phosphatidylinositol-3,5-bisphosphate binding.
PF4	5.27405	14.7148	0.00045																V												Immunology	it may also play an important role in cells undergoing rapid cell division.	Among its related pathways are?DNA Damage?and?FoxO signaling pathway. Gene Ontology (GO) annotations related to this gene include?transferase activity, transferring phosphorus-containing groups?and?protein tyrosine kinase activity.?
PFKFB3	12.0827	16.5514	0.03183	V		V																									Carbon hydrate	Among its related pathways are Collagen formation and Degradation of the extracellular matrix. Gene Ontology (GO) annotations related to this gene include oxidoreductase activity and oxidoreductase activity, acting on paired donors, with incorporation or reduction of molecular oxygen.	Forms hydroxylysine residues in -Xaa-Lys-Gly- sequences in collagens.
PGM2L1	0.89817	1.3391	0.00223			V																									Carbon hydrate	Among its related pathways are PI Metabolism and Glycerophospholipid biosynthesis. Gene Ontology (GO) annotations related to this gene include lysophospholipase activity.
PHB2	426.972	357.153	0.03019	V																											Cell proliferation	Nuclear.Activity	Nuclear receptor coactivator.
PHLDB3	8.25842	16.1399	0.01629																											V	Unknown	DNA repair	Involved in DNA damage tolerance by regulating translesion synthesis (TLS) of templates carrying DNA damage lesions such as 8oxoG and abasic sites (PubMed:24191025).
PIGU	45.5041	39.1076	0.00684										V																		Protein metabolism	Among its related pathways are Transcription-Coupled Nucleotide Excision Repair (TC-NER) and E2F mediated regulation of DNA replication. Gene Ontology (GO) annotations related to this gene include DNA-directed DNA polymerase activity.
PIK3R6	0.09411	0.38929	0.03509																V												Immunology	Among its related pathways are?RNA Polymerase III Transcription Initiation?and?Chks in Checkpoint Regulation. Gene Ontology (GO) annotations related to this gene include?chromatin binding?and?RNA polymerase III activity.
PLA2G12A	28.9309	25.0148	0.00513																	V											Metastasis	Mineral metabolism	Among its related pathways are Cytoskeletal Signaling and Ca, cAMP and Lipid Signaling. Gene Ontology (GO) annotations related to this gene include RNA binding and integrin binding.	Calcium/phospholipid-binding protein which promotes membrane fusion and is involved in exocytosis.
PLA2G5	5.22312	1.85154	0.01728																		V										Cell Signaling	Ativates BCL2 expression and protects neuronal cells from apoptosis (via the N-terminal domain). I	Among its related pathways are?Gene Expression?and?Regulation of TP53 Activity. Gene Ontology (GO) annotations related to this gene include?DNA-binding transcription factor activity?and?transcription factor activity, RNA polymerase II distal enhancer sequence-specific binding.?
PLAU	8.0122	16.0837	0.0171									V																			Amino acid metabolism	both SSF1 and ppan are essential for cell growth and proliferation.
PLCB3	19.1814	27.4722	4e-05																V												Immunology	Gene Ontology (GO) annotations related to this gene include?ribonuclease inhibitor activity.?
PLCG1	27.2496	37.1884	0.02696																V												Immunology	Among its related pathways are?Beta-Adrenergic Signaling?and?PEDF Induced Signaling. Gene Ontology (GO) annotations related to this gene include?RNA binding.
PLEK	1.58199	4.65439	0.03108																V												Immunology	Among its related pathways are?Beta-Adrenergic Signaling?and?PEDF Induced Signaling. Gene Ontology (GO) annotations related to this gene include?calcium ion binding.
PLEKHA5	31.7643	20.5231	0.03836						V																						Phospholipid metabolism	Among its related pathways are Transport to the Golgi and subsequent modification and Metabolism of proteins. Gene Ontology (GO) annotations related to this gene include binding and protein phosphatase binding.
PLK2	8.73658	15.192	0.03565	V																											Cell proliferation	Among its related pathways are?Defective CHST6 causes MCDC1?and?Articular Cartilage Extracellular Matrix. Gene Ontology (GO) annotations related to this gene include?heparin binding?and?extracellular matrix structural constituent. An
PLOD2	206.545	161.441	0.02328									V								V											Amino acid metabolism	Among its related pathways are?Notch Signaling Pathway?and?Signaling by ERBB4. Gene Ontology (GO) annotations related to this gene include?endopeptidase activity.?
PNPLA7	3.74316	5.93122	0.0237						V																						Phospholipid metabolism	Among its related pathways are?DAG and IP3 signaling?and?PAK Pathway. Gene Ontology (GO) annotations related to this gene include?cAMP binding?and?cAMP-dependent protein kinase regulator activity.?
PNRC1	82.3473	63.356	0.02565																		V	V									Cell signaling	Among its related pathways are?DAG and IP3 signaling?and?PAK Pathway. Gene Ontology (GO) annotations related to this gene include?protein kinase binding?and?cAMP binding.
POLDIP2	71.6135	88.1529	0.03711	V																									V		Cell proliferation	its related pathways are Immune response IFN alpha	beta signaling pathway	this gene include methyltransferase activity
POLE2	36.3984	30.6238	0.04	V																											Cell proliferation
POLR3D	19.4657	24.125	0.04035																			V									Nuclear.Activity	Among its related pathways are Signaling by ERBB4 and Signaling by NOTCH1.	Gene Ontology (GO) annotations related to this gene include endopeptidase activity and aspartic-type endopeptidase activity.
POU4F1	4.63896	7.05736	0.0126															V													Apoptosis	An essential function of a modified proteasome, the immunoproteasome, is the processing of class I MHC peptides.	this gene include peptidase activity and threonine-type endopeptidase activity.
PPAN	46.2693	57.9476	0.01803	V																											Cell proliferation	Among its related pathways are?Androgen receptor signaling pathway?and?Meiosis. Gene Ontology (GO) annotations related to this gene include?DNA-binding transcription factor activity?and?nuclear receptor transcription coactivator activity.
PPIH	55.8614	48.6824	0.00809																								V				Protein expression	Immunoprotesome	Among its related pathways are?TCR signaling (REACTOME)?and?Cell Cycle Checkpoints.?
PPP1R8	48.7955	60.7647	0.01193																					V							RNA.Binding	Among its related pathways are?Peptide ligand-binding receptors?and?Signaling by GPCR. Gene Ontology (GO) annotations related to this gene include?G protein-coupled receptor activity?and?prostaglandin F receptor activity.?
PPP2R3A	11.645	9.0291	0.01008																		V										Cell signaling	Among its related pathways are?Signaling by ERBB2?and?PAK Pathway. Gene Ontology (GO) annotations related to this gene include?phosphatase activity?and?non-membrane spanning protein tyrosine phosphatase activity.?
PPP6R1	41.754	48.6446	0.04823										V																		Protein metabolism	Gene Ontology (GO) annotations related to this gene include?nucleic acid binding?and?nucleotide binding.?
PRELP	3.35305	2.7144	0.02535																	V											Metastasis	Among its related pathways are?Peptide ligand-binding receptors?and?Signaling by GPCR. Gene Ontology (GO) annotations related to this gene include?signaling receptor binding?and?G protein-coupled receptor binding.
PRKAR1B	1.15676	0.64065	0.01598																	V											Metastasis	Among its related pathways are Formation of the Editosome and Gene Expression. Gene Ontology (GO) annotations related to this gene include RNA binding and cytidine deaminase activity.
PRKAR2B	38.4142	34.4612	0.01907	V																											Cell proliferation	Among its related pathways are Translocation of GLUT4 to the plasma membrane and Autophagy pathway. Gene Ontology (GO) annotations related to this gene include GTP binding and GDP binding.
PRMT1	163.042	199.348	0.02035																V												Immunology	Among its related pathways are?Endocytosis. Gene Ontology (GO) annotations related to this gene include?calcium ion binding?and?Rab GTPase binding.?
PRRC1	13.9255	17.2967	0.03119																											V	Unknown	Protein transport	Among its related pathways are?Metabolism of proteins?and?Vesicle-mediated transport. Gene Ontology (GO) annotations related to this gene include?transporter activity?and?SNAP receptor activity.?
PSEN2	105.151	93.5997	0.01658	V																											Cell proliferation	Gene Ontology (GO) annotations related to this gene include?nucleic acid binding?and?RNA binding.?
PSMB5	138.832	175.172	0.0052																V												Immunology	Among its related pathways are?Notch Signaling Pathway?and?Spinocerebellar ataxia. Gene Ontology (GO) annotations related to this gene include?DNA-binding transcription factor activity?and?transcription factor activity, RNA polymerase II proximal promoter sequence-specific DNA binding.
PSMC3IP	28.113	25.0014	0.04779																				V								DNA.Binding	Nuclear.Activity	Among its related pathways are?Translesion synthesis by Y family DNA polymerases bypasses lesions on DNA template?and?DNA Damage. Gene Ontology (GO) annotations related to this gene include?protein homodimerization activity?and?ligase activity.
PSME2	30.5909	50.0202	0.04212																V												Immunology	Among its related pathways are?the visual cycle I (vertebrates)?and?Signaling by Retinoic Acid. Gene Ontology (GO) annotations related to this gene include?oxidoreductase activity?and?retinol dehydrogenase activity.?
PTGDR2	0	0.23145	0.04538																V												Immunology	Nuclear.Activity	Required for DNA double-strand breaks (DSBs) formation in unsynapsed regions during meiotic recombination.
PTPN18	0.4706	0.77705	0.03353	V																											Cell proliferation	Among its related pathways are?Transcriptional Regulatory Network in Embryonic Stem Cell?and?Development NOTCH1-mediated pathway for NF-KB activity modulation. Gene Ontology (GO) annotations related to this gene include?DNA-binding transcription factor activity?and?transcription factor binding.?
R3HCC1	16.5287	23.9164	0.00425																											V	Unknown	Among its related pathways are Ectoderm Differentiation and Axon guidance. Gene Ontology (GO) annotations related to this gene include coreceptor activity.
RAB10	90.4863	78.5479	0.0241												V																Nucleotide metabolism	Among its related pathways are?CXCR4-mediated signaling events?and?Signaling by GPCR. Gene Ontology (GO) annotations related to this gene include?GTPase activator activity?and?calmodulin binding.
RAB11FIP4	3.73195	1.90645	0.01783																	V											Metastasis	may play a role in regulation of endothelial cell signaling and vascular function. Gene Ontology (GO) annotations related to this gene include?lipid binding.?
RALY	214.371	174.04	0.02701																					V				V			RNA.Binding	Among its related pathways are Ubiquitin mediated proteolysis and Signaling by Rho GTPases. Gene Ontology (GO) annotations related to this gene include GTP binding.
RBMS1	19.197	31.2754	0.03992	V															V												Cell proliferation	Among its related pathways are?Actin Nucleation by ARP-WASP Complex?and?Apoptotic Pathways in Synovial Fibroblasts. Gene Ontology (GO) annotations related to this gene include?GTP binding?and?GTPase activity.?
RBPJL	0.50026	0.14975	0.01167																				V								DNA.Binding	Immunology	Plays a role in the control of the actin cytoskeleton via activation of the JNK pathway.	Among its related pathways are?Signaling by Rho GTPases?and?p75 NTR receptor-mediated signalling. Gene Ontology (GO) annotations related to this gene include?GTP binding.?
RCHY1	28.8234	33.837	0.02623																			V							V		DNA repair	Among its related pathways are the visual cycle I (vertebrates) and HIV Life Cycle. Gene Ontology (GO) annotations related to this gene include transporter activity and 11-cis retinal binding.
RDH11	46.2412	38.8627	0.01692																											V	Unknown	among its related pathways are?RhoGDI Pathway?and?PAK Pathway. Gene Ontology (GO) annotations related to this gene include?GTP binding?and?GTPase activity.?
REC114	25.1042	14.0571	0.03347																			V							V		DNA repair	E3 ubiquitin ligase that catalyzes the direct transfer of ubiquitin from E2 ubiquitin-conjugating enzyme to a specific substrate. In response to bacterial infection, negatively regulates the phagocyte oxidative burst by controlling the turnover of the NADPH oxidase complex subunits.?
REST	21.3175	18.1475	0.01285																				V								DNA.Binding	May play a role in growth regulation involved in G1	S transition.	Gene Ontology (GO) annotations related to this gene include?ligase activity?and?ubiquitin-protein transferase activity.?
RGMA	7.13038	3.85275	0.00603																											V	Unknown	Among its related pathways are Metabolism of proteins and CDK-mediated phosphorylation and removal of Cdc6. Gene Ontology (GO) annotations related to this gene include ligase activity.
RGS1	0.30859	1.22794	0.02403																V												Immunology	Among its related pathways are?Metabolism of proteins?and?ATM Signaling Network in Development and Disease. Gene Ontology (GO) annotations related to this gene include?protein homodimerization activity?and?ubiquitin-protein transferase activity.
RHOBTB1	2.04361	0.58325	0.01344																	V											Cell migration	Nucleotide metabolism	Among its related pathways are Golgi-to-ER retrograde transport and Cargo trafficking to the periciliary membrane. Gene Ontology (GO) annotations related to this gene include GTP binding and obsolete signal transducer activity.	GTP-binding protein that functions as an allosteric activator of the cholera toxin catalytic subunit, an ADP-ribosyltransferase. Involved in protein trafficking; may modulate vesicle budding and uncoating within the Golgi apparatus.
RHOJ	70.7346	60.8756	0.04979		V																										Angiogenesis	Ontology (GO) annotations related to this gene include?ribonuclease inhibitor activity.
RHOV	0.23071	0.8329	0.01048	V																											Cell proliferation	RNA.Binding	DNA.Binding	Among its related pathways are?mRNA Splicing - Major Pathway. Gene Ontology (GO) annotations related to this gene include?nucleic acid binding.
RLBP1	14.5734	3.5824	0.03392																											V	Unknown	DNA repair	Among its related pathways are Translesion synthesis by Y family DNA polymerases bypasses lesions on DNA template and Transcription-Coupled Nucleotide Excision Repair (TC-NER).	Gene Ontology (GO) annotations related to this gene include single-stranded DNA binding and damaged DNA binding.
RND3	3.46922	6.16583	0.01163																	V											Metastasis	GTPase-activating proteins, such as ARHGAP23, inactivate RHO family proteins by stimulating their hydrolysis of GTP	Among its related pathways are Signaling by Rho GTPases and p75 NTR receptor-mediated signalling. Gene Ontology (GO) annotations related to this gene include GTPase activator activity.
RNF145	36.8468	30.962	0.00442																V												Immunology	This gene include RNA binding and structural constituent of ribosome.
RNF167	32.2756	27.1267	0.02954	V																											Cell proliferation	Among its related pathways are?tRNA Aminoacylation?and?Gene Expression. Gene Ontology (GO) annotations related to this gene include?aminoacyl-tRNA ligase activity.
RNF185	25.3132	30.3921	0.03156										V																		Protein metabolism	Gene Ontology (GO) annotations related to this gene include?enzyme binding.
RNF40	30.0997	37.2113	0.00888	V																											Cell proliferation	Scrapie-responsive gene 1 is associated with neurodegenerative changes observed in transmissible spongiform encephalopathies.
RNH1	32.0162	48.7691	0.02281																								V				Protein expression	This gene encodes a transcriptional regulator belonging to the SCY1-like family of kinase-like proteins.?It activates transcription of the telomerase reverse transcriptase and DNA polymerase beta genes.	Gene Ontology (GO) annotations related to this gene include transferase activity, transferring phosphorus-containing groups and protein tyrosine kinase activity.
RP9	36.8711	32.7018	0.00431																				V	V	V						RNA splicing	Gene Ontology (GO) annotations related to this gene include protein homodimerization activity and protein C-terminus binding.	Binds phosphatidylinositol 4,5-bisphosphate (PIP2). May play a role in the organization of nuclear PIP2, cell division and cell survival (PubMed:15961997).
RPA3	133.587	102.558	0.00367	V																									V		Cell proliferation	Metabolism	Component of the microsomal signal peptidase complex which removes signal peptides from nascent proteins as they are translocated into the lumen of the endoplasmic reticulum.	this gene include peptidase activity and serine-type peptidase activity.
RPL34	532.539	476.872	0.046																								V				Protein expression	Among its related pathways are?Metal ion SLC transporters?and?Transport of glucose and other sugars, bile salts and organic acids, metal ions and amine compounds. Gene Ontology (GO) annotations related to this gene include?cation transmembrane transporter activity.?
SARS2	12.4121	14.8969	0.0017																								V				Protein expression	Among its related pathways are?Salivary secretion?and?Transport of glucose and other sugars, bile salts and organic acids, metal ions and amine compounds. Gene Ontology (GO) annotations related to this gene include?transporter activity?and?anion transmembrane transporter activity.?
SCNM1	25.0299	38.0728	0.02192																						V						RNA splicing	This family member inhibits axonal extension and has been shown to act as a tumor suppressor by inducing apoptosis.
SCRG1	9.9529	5.14029	0.04388																							V					Neuron Degenesis	Neuron growth	Among its related pathways are?Semaphorin interactions?and?Axon guidance.	Gene Ontology (GO) annotations related to this gene include?semaphorin receptor binding.?
SCYL1	63.9566	77.5392	0.0397	V																											Cell proliferation	Protein metabolism	May interact with target proteins during translocation into the lumen of the endoplasmic reticulum. May protect unfolded target proteins against degradation and facilitate correct glycosylation (Potential).
SDCBP2	0.14869	0.61206	0.03428						V																						Phospholipid metabolism	Regulates the inflammatory response by mediating mono- and dimethylation of 'Lys-4' of histone H3 (H3K4me1 and H3K4me2, respectively), leading to activate the transcription of proinflammatory cytokines IL6 and TNF-alpha (By similarity).	Among its related pathways are?PKMTs methylate histone lysines. Gene Ontology (GO) annotations related to this gene include?methyltransferase activity. A
SEC11C	100.217	123.152	0.04404																								V				Protein expression	Among its related pathways are mRNA Splicing - Major Pathway and Gene Expression.	Gene Ontology (GO) annotations related to this gene include nucleic acid binding and nucleotide binding
SEC22A	6.65321	5.57376	0.04278																							V					Metabolism	This gene encodes an adaptor protein and member of a cytoplasmic protein family involved in cell migration. The encoded protein contains a putative Src homology 2 (SH2) domain and guanine nucleotide exchange factor-like domain which allows this signaling protein to form a complex with scaffolding protein Crk-associated substrate.
SEC31A	28.8825	36.2817	0.00915																									V			Metabolism	Among its related pathways are?NF-kappaB Signaling?and?Necroptosis. Gene Ontology (GO) annotations related to this gene include?identical protein binding?and?polyubiquitin modification-dependent protein binding.?
SEMA3B	20.7578	33.2326	0.01817															V													Apoptosis	Transcriptional regulator which can act as both a transcriptional repressor and activator by binding a DNA sequence on these target genes and is involved in processes like cell differentiation, cell migration and cell survival.	Among its related pathways are?Transcriptional misregulation in cancer?and?mir-124 predicted interactions with cell cycle and differentiation. Gene Ontology (GO) annotations related to this gene include?DNA-binding transcription factor activity?and?sequence-specific DNA binding.?
SEMA6D	5.29459	11.499	0.04393																							V					Unknown	RNA.Binding	Among its related pathways are?Chaperonin-mediated protein folding?and?Gene Expression. Gene Ontology (GO) annotations related to this gene include?nucleic acid binding?and?helicase activity.?
SERP2	1.77079	2.97084	0.03489										V						V												Immunology	Adapter protein, which negatively regulates T-cell receptor (TCR) signaling. Inhibits T-cell antigen-receptor induced activation of nuclear factor of activated T-cells.	Among its related pathways are?PDGFR-beta signaling pathway?and?MAPK-Erk Pathway. Gene Ontology (GO) annotations related to this gene include?SH3	SH2 adaptor activity.?
SETD4	0.51863	0.74758	0.04607																V												Immunology	Among its related pathways are Nucleotide Metabolism and Arginine and proline metabolism.	Gene Ontology (GO) annotations related to this gene include protein homodimerization activity and spermidine synthase activity.
SF3B6	138.069	110.091	0.03682																								V				Post-transcription	This transport may be important for activation of tyrosine kinases, some of which could be involved in cancer progression.	Among its related pathways are Metal ion SLC transporters and NRF2 pathway.	Gene Ontology (GO) annotations related to this gene include metal ion transmembrane transporter activity.
SH2D3C	0.14254	1.49188	0.04615																	V											Cell migration	the encoded protein inhibits RhoA activity	Among its related pathways are?Signaling by GPCR?and?Regulation of RAC1 activity. Gene Ontology (GO) annotations related to this gene include?Rho guanyl-nucleotide exchange factor activity.?
SHARPIN	25.5098	32.5416	0.01573															V													Necroptosis	Among its related pathways are?Valproic Acid Pathway, Pharmacodynamics?and?Metabolism. Gene Ontology (GO) annotations related to this gene include?succinate-CoA ligase (ADP-forming) activity.?
SIX4	3.84041	1.89617	0.01545	V																											Cell proliferation	Among its related pathways are Innate Immune System. Gene Ontology (GO) annotations related to this gene include enzyme binding and endopeptidase inhibitor activity.
SKIV2L	27.287	33.0142	0.00258																				V	V							DNA.Binding	Nuclear.Activity	Among its related pathways are?Resolution of D-loop Structures through Holliday Junction Intermediates?and?Fanconi anemia pathway. Gene Ontology (GO) annotations related to this gene include?crossover junction endodeoxyribonuclease activity?and?5'-flap endonuclease activity.?
SLA	0.07021	0.69472	0.04845																V												Immunology
SLC30A2	1.27449	0.811	0.00718																									V			Metabolism	Among its related pathways are?Proteoglycans in cancer?and?Hedgehog signaling pathway (KEGG). Gene Ontology (GO) annotations related to this gene include?G protein-coupled receptor activity?and?PDZ domain binding.?
SLC39A7	83.5194	116.279	0.01706	V																											Cell proliferation	Plays a role in dendrite formation by melanocytes	Among its related pathways are?Transcriptional activity of SMAD2	SMAD3-SMAD4 heterotrimer?and?TGF-beta Signaling Pathways. Gene Ontology (GO) annotations related to this gene include?ligase activity?and?phospholipid binding.
SLC4A2	36.2261	48.4807	0.01076																									V			Metabolism
SLPI	6.13577	2.32331	0.02789																V												Immunology	Among its related pathways are?mRNA Splicing - Major Pathway?and?Processing of Capped Intronless Pre-mRNA.?
SLX1B	4.37235	7.14518	0.02151																			V							V		DNA repair	Gene Ontology (GO) annotations related to this gene include?phosphatidylinositol binding?and?type I transforming growth factor beta receptor binding.?
SMIM10L1	64.1987	43.8199	0.04327																											V	unknown	Protein metabolism	Among its related pathways are Activated PKN1 stimulates transcription of AR (androgen receptor) regulated genes KLK2 and KLK3 and Metabolism of proteins. Gene Ontology (GO) annotations related to this gene include transmembrane signaling receptor activity and low-density lipoprotein particle binding.
SMO	48.221	38.4958	0.0092	V																											Cell proliferation	This protein is a transcriptional activator that may be specifically involved in the differentiation or activation of macrophages or B-cells.	Among its related pathways are Hematopoietic Stem Cell Differentiation and Transcriptional misregulation in cancer. Gene Ontology (GO) annotations related to this gene include DNA-binding transcription factor activity and RNA binding.
SMURF1	15.9757	23.1686	0.00231																	V											Metastasis	Among its related pathways are?Development NOTCH1-mediated pathway for NF-KB activity modulation?and?Chromatin organization. Gene Ontology (GO) annotations related to this gene include?DNA-binding transcription factor activity?and?transcription regulatory region DNA binding.?
SNN	9.9228	14.2325	0.01594																											V	Unknown	Regulates the secretion of TNF-alpha and may also regulate protease secretion.	Among its related pathways are Response to elevated platelet cytosolic Ca2+.	Gene Ontology (GO) annotations related to this gene include collagen binding.
SNRPG	112.691	99.3205	0.02552																								V				Post-transcription	Among its related pathways are Amino Acid metabolism and Urea cycle and metabolism of amino groups. Gene Ontology (GO) annotations related to this gene include protein homodimerization activity and spermidine synthase activity.
SNX25	46.2284	32.0456	0.00075																V												Immunology	Involved in cell cycle progression at S phase.
SORL1	0.05697	0.25333	0.03448							V			V																		lipoproteins metabolism	As part of a homeostatic mechanism that regulates CD8-positive T cell numbers, sialylates core 1 O-glycans of T cell glycoproteins, SPN	CD43 and PTPRC	CD45. Prevents premature apoptosis of thymic CD8-positive T cells prior to peripheral emigration, whereas in the secondary lymphoid organs controls the survival of CD8-positive memory T cells generated following a successful immune response
SPI1	0.7275	2.79732	0.01118																V												Immunology	Protein metabolism	Among its related pathways are Metabolism of proteins and Synthesis of substrates in N-glycan biosythesis. Gene Ontology (GO) annotations related to this gene include sialyltransferase activity.
SRGN	3.77093	15.5983	0.00915																V												Immunology	Gene Ontology (GO) annotations related to this gene include?protein domain specific binding?and?calmodulin binding.?
SRM	75.9738	94.7386	0.02268									V																			Amino acid metabolism	Among its related pathways are Valproic Acid Pathway, Pharmacodynamics and Pyruvate metabolism and Citric Acid (TCA) cycle. Gene Ontology (GO) annotations related to this gene include succinate-CoA ligase (ADP-forming) activity.
SRRT	79.7983	105.187	0.03804	V																											Cell proliferation
ST3GAL1	11.9363	26.8793	0.04462																V												Immunology	Among its related pathways are?Protein-protein interactions at synapses?and?Transmission across Chemical Synapses. Gene Ontology (GO) annotations related to this gene include?calcium ion binding?and?calcium-dependent phospholipid binding.?
ST6GALNAC3	4.78294	2.75614	0.0076			V							V																		Carbon hydrate	Among its related pathways are?RNA Polymerase II Transcription Initiation And Promoter Clearance?and?HIV Life Cycle. Gene Ontology (GO) annotations related to this gene include?DNA-binding transcription factor activity?and?NF-kappaB binding. A
STRN4	61.5269	72.2835	0.01543																		V										Cell signaling	Among its related pathways are NF-kappaB Signaling and Development_Thrombopoetin signaling via JAK-STAT pathway. Gene Ontology (GO) annotations related to this gene include protein homodimerization activity and ATPase activity, coupled to transmembrane movement of substances.
SUCLA2	54.0726	69.5337	0.02335											V																	TCA cycle	Gene Ontology (GO) annotations related to this gene include unfolded protein binding and MHC class I protein binding.	Up to four complexes of MHC class I and this protein may be bound to a single TAP molecule.?
SUCO	28.4402	24.7704	0.04793																											V	Unknown
SYT12	0.14821	0.38987	0.00676																							V					Neuron	Among its related pathways are?Arrhythmogenic right ventricular cardiomyopathy?and?Wnt signaling pathway. Gene Ontology (GO) annotations related to this gene include?DNA-binding transcription factor activity?and?chromatin binding.?
TAF4B	3.99062	3.37753	0.0401																				V								DNA.Binding	Endocytosis	Among its related pathways are Innate Immune System and Metabolism. Gene Ontology (GO) annotations related to this gene include transporter activity and proton transmembrane transporter activity.
TAP1	3.71715	7.2528	0.0399																V												Immunology
TAPBP	6.93373	11.8647	0.01258																V												Immunology	Among its related pathways are?Mitochondrial Gene Expression?and?Organelle biogenesis and maintenance. Gene Ontology (GO) annotations related to this gene include?rRNA (adenine-N6,N6-)-dimethyltransferase activity.?
TCAM1	0.1054	0.33794	0.02961																											V	Unknown	Among its related pathways are Collagen chain trimerization and Response to elevated platelet cytosolic Ca2+.	Gene Ontology (GO) annotations related to this gene include serine-type endopeptidase inhibitor activity and peptidase inhibitor activity.	This gene encodes a Kunitz-type serine protease inhibitor that regulates the tissue factor (TF)-dependent pathway of blood coagulation.
TCF7L1	18.5652	10.7609	0.02458	V																											Cell proliferation	Cell proliferation	Among its related pathways are?GPCR Pathway?and?PAK Pathway. Gene Ontology (GO) annotations related to this gene include?protein homodimerization activity?and?signaling receptor binding.?
TCIRG1	43.1269	85.2263	0.01806																V									V			Immunology	Among its related pathways are?Proteoglycans in cancer?and?Apoptosis-related network due to altered Notch3 in ovarian cancer. Gene Ontology (GO) annotations related to this gene include?calcium ion binding?and?heparin binding.
TCTA	5.7934	9.35414	0.01811																											V	unknown	Glycerolipids metabolism	Among its related pathways are Metabolism and Import of palmitoyl-CoA into the mitochondrial matrix. Gene Ontology (GO) annotations related to this gene include protein homodimerization activity.	Important for the biosynthesis of triglycerides with medium-length fatty acid chains.
TFB1M	17.1629	14.6033	0.02588																			V									Nuclear.Activity	Among its related pathways are?Diseases associated with the TLR signaling cascade?and?IL1 and megakaryocytes in obesity. Gene Ontology (GO) annotations related to this gene include?protein heterodimerization activity?and?transmembrane signaling receptor activity.?
TFPI	41.4109	74.8947	0.00028																	V											Metastasis	This gene encodes a protein containing a potential N-terminal transmembrane domain and multiple armadillo (arm) repeats. Proteins containing arm repeats are involved in development, maintenance of tissue integrity, and tumorigenesis.,Gene Ontology (GO) annotations related to this gene include binding.
TGFB2	4.14879	2.17387	0.01957	V																V											Metastasis	This gene encodes a member of the ALEX family of proteins which may play a role in tumor suppression.	Gene Ontology (GO) annotations related to this gene include binding.
THBS1	14.0381	26.1284	0.00026															V													Apoptosis	Among its related pathways are?Activated TLR4 signalling?and?NF-kappaB Signaling. Gene Ontology (GO) annotations related to this gene include?identical protein binding?and?transmembrane signaling receptor activity.?
THRSP	4.05591	2.02546	0.01321				V	V																							Fatty acid metabolism	Among its related pathways are Golgi-to-ER retrograde transport and Metabolism of proteins. Gene Ontology (GO) annotations related to this gene include syntaxin binding.
TLR2	0.69084	1.37497	0.00885																V												Immunology	Plays a role in cilia formation and embryonic patterning.?
TLR3	8.02708	10.8382	0.02833																V												Immunology
TMED9	115.409	154.639	0.0211										V																		Protein metabolism	Potential coactivator of the androgen receptor. Mediates STAT3 degradation.	Among its related pathways are?Vesicle-mediated transport?and?Coregulation of Androgen receptor activity. Gene Ontology (GO) annotations related to this gene include?transcription coregulator activity.
TMEM107	13.4787	9.33114	0.04306																											V	Unknown	Acts as a negative mediator of apoptosis and may play a role in tumor progression.	Among its related pathways are?Metabolism?and?Glycerophospholipid biosynthesis. Gene Ontology (GO) annotations related to this gene include?cysteine-type endopeptidase inhibitor activity involved in apoptotic process.?
TMEM243	11.4219	9.23718	0.03216																											V	unknown	Receptor for TNFSF12	TWEAK. Weak inducer of apoptosis in some cell types. Promotes angiogenesis and the proliferation of endothelial cells.	Among its related pathways are TNFR1 Pathway and PEDF Induced Signaling.
TMF1	58.4517	81.1839	0.0034																			V									Nuclear.Activity	Immunology	This receptor is capable of inducing apoptosis by a caspase-independent mechanism,	Among its related pathways are?TRAF Pathway?and?TNF Superfamily - Human Ligand-Receptor Interactions and their Associated Functions. Gene Ontology (GO) annotations related to this gene include?tumor necrosis factor-activated receptor activity.?
TNFAIP8	32.0677	26.8669	0.01891															V													Apoptosis	Among its related pathways are?Focal Adhesion?and?Actin Nucleation by ARP-WASP Complex. Gene Ontology (GO) annotations related to this gene include?identical protein binding?and?protein kinase activity.?
TNFRSF12A	34.2993	68.6728	0.03712															V													Apoptosis	Among its related pathways are?Deadenylation-dependent mRNA decay?and?Gene Expression. Gene Ontology (GO) annotations related to this gene include?enzyme binding?and?ankyrin binding.?
TNFRSF19	3.03428	5.57092	0.01609															V	V												Apoptosis	Among its related pathways are?Striated Muscle Contraction?and?Cardiac conduction. Gene Ontology (GO) annotations related to this gene include?protein kinase binding?and?protein domain specific binding.?
TNK2	25.9989	33.6778	0.01029																	V											Metastasis	Gene Ontology (GO) annotations related to this gene include?binding.?
TNKS1BP1	16.6156	23.8169	0.00029																			V									Nuclear.Activity	Among its related pathways are?Adhesion?and?PI3K	Akt Signaling. Gene Ontology (GO) annotations related to this gene include?kinase binding?and?phosphoprotein phosphatase activity.?
TNNI3	0.0663	0.4633	0.01204																											V	Unknown	Gene Ontology (GO) annotations related to this gene include?ATPase activity.?
TNS2	25.2003	20.2945	0.00142																	V											Metastasis	its related pathways are EPH-Ephrin signaling and Innate Immune System.	this gene include actin binding and structural constituent of cytoskeleton.
TOR3A	5.66737	7.41522	0.03417																											V	Unknown	Among its related pathways are?Vesicle-mediated transport?and?Clathrin derived vesicle budding. Gene Ontology (GO) annotations related to this gene include?protein homodimerization activity?and?protein heterodimerization activity.
TPD52L1	79.5728	65.2591	0.00092																									V			Protein transport
TPGS2	10.8508	9.28015	0.02009																											V	unknown	Among its related pathways are?Vesicle-mediated transport?and?RAB GEFs exchange GTP for GDP on RABs. Gene Ontology (GO) annotations related to this gene include?structural molecule activity?and?endopeptidase activity.
TRAPPC12	27.3949	23.7781	0.04521																									V			Protein transport	Among its related pathways are Transport to the Golgi and subsequent modification and Metabolism of proteins.
TRAPPC2L	52.2326	67.6523	0.01264										V																		Protein metabolism	Among its related pathways are?Gene Expression?and?Direct p53 effectors. Gene Ontology (GO) annotations related to this gene include?p53 binding?and?phosphatidic acid transporter activity.
TRIAP1	16.9531	14.9553	0.03291															V													Apoptosis	Among its related pathways are?Interferon gamma signaling?and?Cytokine Signaling in Immune system.?
TRIM26	14.306	20.1644	0.00751																V												Immunology	Among its related pathways are?Class I MHC mediated antigen processing and presentation?and?Innate Immune System. Gene Ontology (GO) annotations related to this gene include?ligase activity.?
TRIM41	19.2724	24.1009	0.03699																V												Immunology
TRIM65	3.05141	5.59971	0.04186																											V	Unknown	Acts as a transcriptional coactivator for NF-kappa-B and JUN, and mediates the transrepression of these transcription factors induced by glucocorticoid receptor.	Among its related pathways are?LPA receptor mediated events?and?NOD-like receptor signaling pathway. Gene Ontology (GO) annotations related to this gene include?thyroid hormone receptor binding.?
TRIP6	39.0931	55.36	0.00711																V												Immunology	Among its related pathways are?Ion channel transport?and?Transport of glucose and other sugars, bile salts and organic acids, metal ions and amine compounds. Gene Ontology (GO) annotations related to this gene include?chloride channel activity.?
TRIT1	8.17957	12.4132	0.01596																								V				Metabolism	The proteins mediate signal transduction events that play a role in the regulation of cell development, activation, growth and motility.?
TSPAN13	36.7932	31.733	0.03286	V																											Cell proliferation	Metastasis	The proteins mediate signal transduction events that play a role in the regulation of cell development, activation, growth and motility.?
TSPAN15	7.18414	5.9299	0.01651	V																V											Cell proliferation
TTYH2	30.7444	41.8409	0.01137																									V			Metabolism	the melanin biosynthetic pathway
TWSG1	29.3938	26.1769	0.01181																V												Immunology	May play a role in thymocyte development?	Among its related pathways are?Mesodermal Commitment Pathway.
TYRP1	3289.12	5184.9	0.00716									V																V			Protein transport	Amino acid metabolism	Among its related pathways are Direct p53 effectors and Viral mRNA Translation. Gene Ontology (GO) annotations related to this gene include protein homodimerization activity and oxidoreductase activity.	This gene encodes a melanosomal enzyme that belongs to the tyrosinase family and plays an important role in the melanin biosynthetic pathway.
UBE2D3	299.361	242.584	0.01706															V													Apoptosis	This enzyme functions in the ubiquitination of the tumor-suppressor protein p53,
UCHL3	72.3091	89.781	0.02026										V																		Protein metabolism	Among its related pathways are CDK-mediated phosphorylation and removal of Cdc6 and Metabolism of proteins. Gene Ontology (GO) annotations related to this gene include peptidase activity and ubiquitin binding.
USF2	88.425	77.9132	0.00531																				V								DNA.Binding	Among its related pathways are?Validated transcriptional targets of AP1 family members Fra1 and Fra2. Gene Ontology (GO) annotations related to this gene include?DNA-binding transcription factor activity?and?sequence-specific DNA binding.
USP2	4.41413	2.12873	0.02002	V																											Cell Proliferation	Among its related pathways are DNA Damage and Metabolism of proteins. Gene Ontology (GO) annotations related to this gene include identical protein binding and cysteine-type endopeptidase activity.
USP30	7.86053	10.0027	0.00578										V																		Protein metabolism	Among its related pathways are Metabolism of proteins and Deubiquitination. Gene Ontology (GO) annotations related to this gene include cysteine-type endopeptidase activity and thiol-dependent deubiquitinase.
VASN	3.03024	4.51787	0.00761	V															V												Cell proliferation	Immunology	May act as an inhibitor of TGF-beta signaling.	Gene Ontology (GO) annotations related to this gene include transforming growth factor beta binding.
VDAC2	231.536	307.659	0.00569															V													Apoptosis	involved in the mitochondrial apoptotic pathway via regulation of BCL2-antagonist	killer 1 protein activity	nucleotide binding and voltage-gated anion channel activity
VGLL3	15.2217	25.0315	0.04397																											V	Unknown	May act as a specific coactivator for the mammalian TEFs.?
VPS18	13.3471	17.2993	0.04938																V												Immunology	Among its related pathways are?Salmonella infection (KEGG). Gene Ontology (GO) annotations related to this gene include?binding?and?syntaxin binding.
VPS33B	10.8714	13.4673	0.02714																									V			Metabolism	May play a role in vesicle-mediated protein trafficking to lysosomal compartments and in membrane docking	fusion reactions of late endosomes	lysosomes.
VPS37D	1.81403	1.2812	0.02618																									V			Protein transport	Among its related pathways are?Vesicle-mediated transport?and?HIV Life Cycle.?
VWF	3.04236	5.28691	0.02224																		V										Cell signaling	Among its related pathways are?Integrin alphaIIb beta3 signaling?and?RET signaling. Gene Ontology (GO) annotations related to this gene include?protein homodimerization activity?and?integrin binding.
WDR55	33.0499	29.5032	0.00687																											V	Unknown	Nucleolar protein that acts as a modulator of rRNA synthesis.?
WDR5B	2.15823	3.15795	0.04822																											V	Metabolism	Among its related pathways are?Aldosterone synthesis and secretion.?
WHRN	6.70251	10.4835	0.02294																											V	Unknown
XBP1	91.0081	121.079	0.04895																V												Immunology	Promote MHC II expression	Among its related pathways are Unfolded Protein Response (UPR) and Photodynamic therapy-induced unfolded protein response. Gene Ontology (GO) annotations related to this gene include DNA-binding transcription factor activity and sequence-specific DNA binding.
XYLT1	9.34923	4.78603	0.00053			V									V																Carbon hydrate	Nucleotide metabolism	Among its related pathways are Glycosaminoglycan metabolism and Chondroitin sulfate/dermatan sulfate metabolism. Gene Ontology (GO) annotations related to this gene include acetylglucosaminyltransferase activity and protein xylosyltransferase activity.	Catalyzes the first step in the biosynthesis of chondroitin sulfate and dermatan sulfate proteoglycans, such as DCN. Transfers D-xylose from UDP-D-xylose to specific serine residues of the core protein (PubMed:15461586, PubMed:17189265, PubMed:24581741, PubMed:23982343).
YBX3	550.594	491.236	0.03215															V	V												Apoptosis	Immunology	Binds to the GM-CSF promoter. Seems to act as a repressor.
YWHAQ	328.702	266.111	0.008	V																											Cell proliferation	its related pathways are Beta-Adrenergic Signaling and MAPK-Erk Pathway.
ZC3H12A	1.40593	2.60434	0.0145		V														V												Angiogenesis	Immunology	Gene Ontology (GO) annotations related to this gene include?endonuclease activity.?
ZDHHC2	37.3079	19.6226	0.00019										V																		Protein metabolism	Among its related pathways are Metabolism of proteins and Surfactant metabolism. Gene Ontology (GO) annotations related to this gene include signaling receptor activity and palmitoyltransferase activity.
ZMPSTE24	40.0277	52.2735	0.0119				V						V																		Fatty acid metabolism	Protein metabolism	Among its related pathways are Adipogenesis. Gene Ontology (GO) annotations related to this gene include metalloendopeptidase activity and metalloexopeptidase activity.
ZSCAN25	6.68627	9.18072	0.02351																				V								DNA.Binding	Among its related pathways are?Gene Expression. Gene Ontology (GO) annotations related to this gene include?nucleic acid binding?and?DNA-binding transcription factor activity.
