# Supplementary material for: Transdermal nanolipoplex simultaneously inhibits subcutaneous melanoma growth and suppresses systemically metastatic melanoma by activating host immunity
Source: Research Square preprint supplement (doi:10.21203/rs.3.rs-1425588/v1), 2022-03-10
Supplement: Supplementary file 6 [file 49b95ba700e9c322284ef327.xlsx]

## Sheet: apoptosis
apoptosis- enriched genes (16)
Gene	GeneCards	GO Feature	KEGG ID	KEGG Description	PMID	Reference
CASP12	Apoptosis/Among its related pathways are Apoptosis Pathway and Apoptotic Pathways in Synovial Fibroblasts.	Gene Ontology (GO) annotations related to this gene include cysteine-type endopeptidase activity and cysteine-type endopeptidase activity involved in execution phase of apoptosis.	hsa04210	Caspase activation	-	-
CAPN1	Apoptosis/Among its related pathways are Innate Immune System and Integrin-mediated Cell Adhesion.	Gene Ontology (GO) annotations related to this gene include calcium ion binding and calcium-dependent cysteine-type endopeptidase activity.	hsa04210	Caspase activation	-	-
CAPN2	Apoptosis/Among its related pathways are ICos-ICosL Pathway in T-Helper Cell and ErbB1 downstream signaling.	Gene Ontology (GO) annotations related to this gene include calcium ion binding and peptidase activity.	hsa04211	Caspase activation	-	-
THBS1	Apoptosis/Among its related pathways are Integrin cell surface interactions and MET promotes cell motility.	Gene Ontology (GO) annotations related to this gene include calcium ion binding and heparin binding.	hsa04145	Protein processing	-	-
VDAC2	Apoptosis/Among its related pathways are Cytoskeletal Signaling and Deubiquitination. PMID: 22705850	Gene Ontology (GO) annotations related to this gene include nucleotide binding and voltage-gated anion channel activity. Signaling and Deubiquitination.	hsa04217	TNF pathway	-	-
HSPA5	Apoptosis/Among its related pathways are Cellular response to heat stress and Unfolded Protein Response (UPR).	Gene Ontology (GO) annotations related to this gene include calcium ion binding and ubiquitin protein ligase binding.	hsa04141	Protein processing	-	-
UBE2D3	Apoptosis/This enzyme functions in the ubiquitination of the tumor-suppressor protein p53	Gene Ontology (GO) annotations related to this gene include ligase activity and acid-amino acid ligase activity.	hsa04141	Protein processing	-	-
SHARPIN	Necroptosis/Among its related pathways are TNF signaling and Protein-protein interactions at synapses.	Gene Ontology (GO) annotations related to this gene include identical protein binding and polyubiquitin modification-dependent protein binding.	hsa04217	TNF pathway	-	-
TNFAIP8	Among its related pathways are Glycerophospholipid biosynthesis and Metabolism.	Gene Ontology (GO) annotations related to this gene include cysteine-type endopeptidase inhibitor activity involved in apoptotic process.	-	-	30647104	Dual Targeting of EGFR and IGF1R in the TNFAIP8 Knockdown Non-Small Cell Lung Cancer Cells
TRIAP1	Among its related pathways are Gene Expression and TP53 Regulates Transcription of Cell Death Genes.	Gene Ontology (GO) annotations related to this gene include p53 binding and phosphatidic acid transporter activity.	-	-	15735003	p53CSV, a novel p53-inducible gene involved in the p53-dependent cell-survival pathway
DAPK2	Among its related pathways are Bladder Cancer and CDK-mediated phosphorylation and removal of Cdc6.	Gene Ontology (GO) annotations related to this gene include identical protein binding and protein kinase activity.	-	-	25741596	DAPK2 regulates oxidative stress in cancer cells by preserving mitochondrial function
PAWR	Among its related pathways are Coregulation of Androgen receptor activity and Apoptosis and Autophagy.	Gene Ontology (GO) annotations related to this gene include enzyme binding and transcription corepressor activity.	-	-	18959781	Heterogeneous in vitro effects of doxorubicin on gene expression in primary human liposarcoma cultures
PDCD4	Among its related pathways are MAPK Signaling: Mitogens and Apoptosis and Autophagy.	Gene Ontology (GO) annotations related to this gene include RNA binding and binding.	-	-	31789394	MicroRNA‑21 contributes to renal cell carcinoma cell invasiveness and angiogenesis via the PDCD4/c‑Jun (AP‑1) signalling pathway
TNFRSF19	Among its related pathways are TRAF Pathway and TNF Superfamily - Human Ligand-Receptor Interactions and their Associated Functions.	Gene Ontology (GO) annotations related to this gene include tumor necrosis factor-activated receptor activity.	-	-	-	-
TNFRSF12A	Among its related pathways are CDK-mediated phosphorylation and removal of Cdc6 and TRAF Pathway.	-	-	-	30218067	Autophagy differentially regulates TNF receptor Fn14 by distinct mammalian Atg8 proteins
ANXA5	Among its related pathways are Regulation of CFTR activity (norm and CF) and Ca, cAMP and Lipid Signaling.	Gene Ontology (GO) annotations related to this gene include calcium ion binding and calcium-dependent phospholipid binding.	-	-	-	-
apoptosis- non-enriched genes (7)
CCDC8	Apoptosis/The encoded protein functions as a cofactor required for p53-mediated apoptosis following DNA damage, and may also play a role in growth through interactions with the cytoskeletal adaptor protein obscurin-like 1.	-	-	-	-	-
ITGB3BP(NRIF3)	Apoptosis/Among its related pathways are Cell Cycle, Mitotic and Mitotic Metaphase and Anaphase. This protein also acts as a corepressor of NF-kappaB-dependent signaling.	Gene Ontology (GO) annotations related to this gene include obsolete signal transducer activity and protein C-terminus binding.	-	-	-	-
MAP1S	Apoptosis/Microtubule-associated protein that mediates aggregation of mitochondria resulting in cell death and genomic destruction (MAGD). Plays a role in anchoring the microtubule organizing center to the centrosomes.	Gene Ontology (GO) annotations related to this gene include identical protein binding and actin filament binding.	-	-	-	-
PELI1	Apoptosis/Among its related pathways are Activated TLR4 signalling and IL-1 signaling pathway.	Gene Ontology (GO) annotations related to this gene include ligase activity and ubiquitin-protein transferase activity.	-	-	-	-
POU4F1	Apoptosis/Among its related pathways are Regulation of TP53 Activity and Gene Expression.	Gene Ontology (GO) annotations related to this gene include DNA-binding transcription factor activity and transcription factor activity, RNA polymerase II distal enhancer sequence-specific binding.	-	-	-	-
SEMA3B	Apoptosis/Among its related pathways are Neuroscience. An important paralog of this gene is SEMA3A.	-	-	-	-	-
YBX3	Apoptosis/Among its related pathways are Cytoskeleton remodeling Regulation of actin cytoskeleton by Rho GTPases and Bisphosphonate Pathway, Pharmacodynamics.	Gene Ontology (GO) annotations related to this gene include nucleic acid binding and DNA-binding transcription factor activity.	-	-	-	-
