# Supplementary material for: Transdermal nanolipoplex simultaneously inhibits subcutaneous melanoma growth and suppresses systemically metastatic melanoma by activating host immunity
Source: Research Square preprint supplement (doi:10.21203/rs.3.rs-1425588/v1), 2022-03-10
Supplement: Supplementary file 7 [file 70b8d26c2359bbe570f2c133.xlsx]

## Sheet: metastasis
metastasis- enriched genes (14)
Gene	GeneCards/Entrez Gene/UniProtKB	GO Feature	KEGG ID	KEGG Description	PMID	Reference
NPNT	May play a role in the development and function of various tissues, regulating cell adhesion, spreading and survival through the binding of several integrins (By similarity).	Gene Ontology (GO) annotations related to this gene include calcium ion binding and integrin binding.	hsa255743	Focal adhesion	-	-
PARVG	Probably plays a role in the regulation of cell adhesion and cytoskeleton organization.	Gene Ontology (GO) annotations related to this gene include actin binding.	hsa64098	Focal adhesion	-	-
ACTN4	Among its related pathways are Striated Muscle Contraction and Nephrin interactions.	Gene Ontology (GO) annotations related to this gene include RNA binding and protein homodimerization activity.	hsa81	Focal adhesion	-	-
COL9A2	Among its related pathways are Integrin Pathway and ERK Signaling.	Gene Ontology (GO) annotations related to this gene include extracellular matrix structural constituent conferring tensile strength.	hsa1298	Focal adhesion	-	-
PARD6B	Among its related pathways are Cell junction organization and G-protein signaling RAC1 in cellular process.	-	hsa84612	Rap1 signaling pathway	-	-
TGFB2	Among its related pathways are CREB Pathway and Signaling events mediated by the Hedgehog family.	Gene Ontology (GO) annotations related to this gene include protein homodimerization activity and signaling receptor binding.	hsa7042	TGF-beta signaling pathway	-	-
ARHGAP23	Among its related pathways are Signaling by GPCR and p75 NTR receptor-mediated signalling.	Gene Ontology (GO) annotations related to this gene include GTPase activator activity.	-	-	27226243	A lateral signalling pathway coordinates shape volatility during cell migration
ARHGEF25	Among its related pathways are RET signaling and Signaling by GPCR.	Gene Ontology (GO) annotations related to this gene include guanyl-nucleotide exchange factor activity.	-	-	26465210	Phosphoinositide 3-kinase enables phagocytosis of large particles by terminating actin assembly through Rac/Cdc42 GTPase-activating proteins
PLOD2	Among its related pathways are Collagen formation and Degradation of the extracellular matrix.	Gene Ontology (GO) annotations related to this gene include oxidoreductase activity and oxidoreductase activity, acting on paired donors, with incorporation or reduction of molecular oxygen.	-	-	29603227	PLOD2 as a potential regulator of peritoneal dissemination in gastric cancer
PRELP	Among its related pathways are Glycosaminoglycan metabolism and Articular Cartilage Extracellular Matrix.	Gene Ontology (GO) annotations related to this gene include heparin binding and extracellular matrix structural constituent.	-	-	33033521	PRELP has prognostic value and regulates cell proliferation and migration in hepatocellular carcinoma
RND3	Among its related pathways are Actin Nucleation by ARP-WASP Complex and Phospholipase-C Pathway.	Gene Ontology (GO) annotations related to this gene include GTP binding and GTPase activity.	-	-	19244113	Rnd3 regulation of the actin cytoskeleton promotes melanoma migration and invasive outgrowth in three dimensions
PEG10	Among its related pathways are Validated targets of C-MYC transcriptional activation.	Gene Ontology (GO) annotations related to this gene include nucleic acid binding and RNA binding.	-	-	31318088	Declination of long noncoding RNA paternally expressed gene 10 inhibits A375 cells proliferation, migration, and invasion via mediating microRNA-33a
FAM49A	May negatively regulate RAC1 signaling and RAC1-driven cytoskeletal remodeling (Probable).	-	-	-	29632189	Genome-wide CRISPR screen identifies FAM49B as a key regulator of actin dynamics and T cell activation
TNK2	Among its related pathways are G-protein signaling_Regulation of CDC42 activity and Tyrosine Kinases / Adaptors.	Gene Ontology (GO) annotations related to this gene include identical protein binding and protein kinase activity.	-	-	17494760	Activated Cdc42-associated kinase Ack1 promotes prostate cancer progression via androgen receptor tyrosine phosphorylation
			-	-	10587647	Melanoma chondroitin sulphate proteoglycan regulates cell spreading through Cdc42, Ack-1 and p130cas
metastasis- non-enriched genes (18)
CCDC8	The encoded protein functions as a cofactor required for p53-mediated apoptosis following DNA damage, and may also play a role in growth through interactions with the cytoskeletal adaptor protein obscurin-like 1.	-	-	-	-	-
CDHR4	preferentially interact with themselves in a homophilic manner in connecting cells; cadherins may thus contribute to the sorting of heterogeneous cell types	Gene Ontology (GO) annotations related to this gene include calcium ion binding.	-	-	-	-
EMILIN2	May be responsible for anchoring smooth muscle cells to elastic fibers, and may be involved not only in the formation of the elastic fiber, but also in the processes that regulate vessel assembly. Has cell adhesive capacity.	Gene Ontology (GO) annotations related to this gene include extracellular matrix constituent conferring elasticity.	-	-	-	-
GPNMB	Among its related pathways are Signaling by PTK6 and Signaling by GPCR. The protein encoded by this gene is a type I transmembrane glycoprotein which shows homology to the pMEL17 precursor, a melanocyte-specific protein. GPNMB shows expression in the lowly metastatic human melanoma cell lines and xenografts but does not show expression in the highly metastatic cell lines.	Gene Ontology (GO) annotations related to this gene include heparin binding and integrin binding.	-	-	-	-
IER2	-	-	-	-	-	-
LAMA4	Among its related pathways are Integrin Pathway and ERK Signaling.	Gene Ontology (GO) annotations related to this gene include protein tyrosine kinase activity and obsolete signal transducer activity.	-	-	-	-
LRRC4B	The trans-synaptic adhesion between LRRC4B and PTPRF regulates the formation of excitatory synapses in a bidirectional manner (By similarity).	Gene Ontology (GO) annotations related to this gene include signaling receptor binding.	-	-	-	-
MYO9B	Among its related pathways are Actin Nucleation by ARP-WASP Complex and Regulation of actin dynamics for phagocytic cup formation.	Gene Ontology (GO) annotations related to this gene include protein homodimerization activity and GTPase activator activity.	-	-	-	-
PALLD	The protein is a component of actin-containing microfilaments, and it is involved in the control of cell shape, adhesion, and contraction. Polymorphisms in this gene are associated with a susceptibility to pancreatic cancer type 1, and also with a risk for myocardial infarction.	Gene Ontology (GO) annotations related to this gene include actin binding and muscle alpha-actinin binding.	-	-	-	-
PLA2G12A	Among its related pathways are Sweet Taste Signaling and Phospholipase-C Pathway.	Gene Ontology (GO) annotations related to this gene include calcium ion binding and calcium-dependent phospholipase A2 activity.	-	-	-	-
PRKAR1B	Among its related pathways are Sweet Taste Signaling and CREB Pathway.	Gene Ontology (GO) annotations related to this gene include cAMP binding and cAMP-dependent protein kinase regulator activity.	-	-	-	-
RAB11FIP4	Acts as a regulator of endocytic traffic by participating in membrane delivery. Required for the abcission step in cytokinesis, possibly by acting as an 'address tag' delivering recycling endosome membranes to the cleavage furrow during late cytokinesis.	Gene Ontology (GO) annotations related to this gene include calcium ion binding and small GTPase binding.	-	-	-	-
RHOBTB1	Among its related pathways are Signaling by GPCR and p75 NTR receptor-mediated signalling.	Gene Ontology (GO) annotations related to this gene include GTP binding.	-	-	-	-
SH2D3C	The encoded protein contains a putative Src homology 2 (SH2) domain and guanine nucleotide exchange factor-like domain which allows this signaling protein to form a complex with scaffolding protein Crk-associated substrate.	Gene Ontology (GO) annotations related to this gene include guanyl-nucleotide exchange factor activity and obsolete SH3/SH2 adaptor activity.	-	-	-	-
SMURF1	Among its related pathways are CDK-mediated phosphorylation and removal of Cdc6 and Signaling by BMP.	Gene Ontology (GO) annotations related to this gene include ligase activity and phospholipid binding.	-	-	-	-
TFPI	Among its related pathways are Formation of Fibrin Clot (Clotting Cascade) and Collagen formation.	Gene Ontology (GO) annotations related to this gene include serine-type endopeptidase inhibitor activity and peptidase inhibitor activity.	-	-	-	-
TNS2	Among its related pathways are PI3K / Akt Signaling and Adhesion.	Gene Ontology (GO) annotations related to this gene include kinase binding and phosphoprotein phosphatase activity.	-	-	-	-
TSPAN15	The proteins mediate signal transduction events that play a role in the regulation of cell development, activation, growth and motility.	Gene Ontology (GO) annotations related to this gene include enzyme binding.	-	-	-	-
