# Supplementary material for: Transdermal nanolipoplex simultaneously inhibits subcutaneous melanoma growth and suppresses systemically metastatic melanoma by activating host immunity
Source: Research Square preprint supplement (doi:10.21203/rs.3.rs-1425588/v1), 2022-03-10
Supplement: Supplementary file 8 [file a2353a28cc447cbf2504b07b.xlsx]

## Sheet: immune
immune-enriched genes (40)
Gene	GeneCards	GO Feature	KEGG ID	KEGG Description	PMID	Reference
IRF9	Among its related pathways are Interferon gamma signaling and Jak/STAT Signaling Pathway.	Gene Ontology (GO) annotations related to this gene include DNA-binding transcription factor activity.	hsa05167	Kaposi sarcoma-associated herpesvirus infection	-	-
TAPBP	Among its related pathways are Innate Immune System and Antigen Presentation- Folding, assembly and peptide loading of class I MHC.	Gene Ontology (GO) annotations related to this gene include unfolded protein binding and MHC class I protein binding.	hsa05163	Human cytomegalovirus infection	-	-
TAP1	Among its related pathways are NF-kappaB Signaling and Development_Thrombopoetin signaling via JAK-STAT pathway.	Gene Ontology (GO) annotations related to this gene include protein homodimerization activity and ATPase activity, coupled to transmembrane movement of substances.	hsa04612	Antigen processing and presentation	-	-
CCL2	Among its related pathways are CCR5 Pathway in Macrophages and IL1 and megakaryocytes in obesity.	Gene Ontology (GO) annotations related to this gene include protein kinase activity and heparin binding.	hsa04062	Chemokine signaling pathway	-	-
CXCL13	Among its related pathways are CCR5 Pathway in Macrophages and PEDF Induced Signaling.	Gene Ontology (GO) annotations related to this gene include protein heterodimerization activity and chemokine activity.	hsa04062	Chemokine signaling pathway	-	-
PIK3R6	Among its related pathways are CCR5 Pathway in Macrophages and Response to elevated platelet cytosolic Ca2+.	Gene Ontology (GO) annotations related to this gene include 1-phosphatidylinositol-3-kinase regulator activity and phosphatidylinositol-4,5-bisphosphate 3-kinase activity.	hsa04062	Chemokine signaling pathway	-	-
PLCB3	Among its related pathways are CCR5 Pathway in Macrophages and RhoGDI Pathway.	Gene Ontology (GO) annotations related to this gene include calcium ion binding and calmodulin binding.	hsa04062	Chemokine signaling pathway	-	-
PLCG1	Among its related pathways are CCR5 Pathway in Macrophages and RhoGDI Pathway.	Gene Ontology (GO) annotations related to this gene include calcium ion binding and obsolete signal transducer activity.	hsa04062	Chemokine signaling pathway	-	-
LYN	Among its related pathways are CCR5 Pathway in Macrophages and RhoGDI Pathway.	Gene Ontology (GO) annotations related to this gene include transferase activity, transferring phosphorus-containing groups and protein tyrosine kinase activity.	hsa04062	Chemokine signaling pathway	-	-
CLEC4E	Among its related pathways are Defective GALNT12 causes colorectal cancer 1 (CRCS1) and Innate Immune System.	Gene Ontology (GO) annotations related to this gene include carbohydrate binding.	hsa05152	Tuberculosis	-	-
TLR2	Among its related pathways are Diseases associated with the TLR signaling cascade and IL1 and megakaryocytes in obesity.	Gene Ontology (GO) annotations related to this gene include protein heterodimerization activity and transmembrane signaling receptor activity.	hsa05417	Lipid and atherosclerosis	-	-
GNB3	Among its related pathways are Platelet homeostasis and CCR5 Pathway in Macrophages.	Gene Ontology (GO) annotations related to this gene include GTPase activity and spectrin binding.	hsa04062	Chemokine signaling pathway	-	-
NOS2	Among its related pathways are Platelet homeostasis and Prolactin Signaling Pathway.	Gene Ontology (GO) annotations related to this gene include protein homodimerization activity and oxidoreductase activity.	hsa05152	Tuberculosis	-	-
LTB	Among its related pathways are TRAF Pathway and Cytokine Signaling in Immune system.	Gene Ontology (GO) annotations related to this gene include?signaling receptor binding and tumor necrosis factor receptor binding.	hsa04064	NF-kappa B signaling pathway	-	-
LY96	Among its related pathways are Transcription_NF-kB signaling pathway and Activated TLR4 signalling.	Gene Ontology (GO) annotations related to this gene include coreceptor activity and lipopolysaccharide receptor activity.	hsa05417	Lipid and atherosclerosis	-	-
PF4	Among its related pathways are Formation of Fibrin Clot (Clotting Cascade) and CCR5 Pathway in Macrophages.	Gene Ontology (GO) annotations related to this gene include heparin binding and CXCR3 chemokine receptor binding.	hsa04062	Chemokine signaling pathway	-	-
CEBPB	Among its related pathways are Development_Glucocorticoid receptor signaling and MAPK-Erk Pathway.	Gene Ontology (GO) annotations related to this gene include DNA-binding transcription factor activity and sequence-specific DNA binding.	hsa05152	Tuberculosis	-	-
ITGAM	Among its related pathways are Integrin cell surface interactions and ERK Signaling.	Gene Ontology (GO) annotations related to this gene include protein heterodimerization activity.	hsa04015	Rap1 signaling pathway	-	-
CCR5	Among its related pathways are CCR5 Pathway in Macrophages and Jak-Stat Signaling Pathway (sino).	Gene Ontology (GO) annotations related to this gene include G protein-coupled receptor activity and phosphatidylinositol phospholipase C activity.	hsa04062	Chemokine signaling pathway	-	-
CTSS	Among its related pathways are Activated TLR4 signalling and Degradation of the extracellular matrix.	Gene Ontology (GO) annotations related to this gene include peptidase activity and cysteine-type peptidase activity.	hsa04142	Lysosome	-	-
CTSB	Among its related pathways are Innate Immune System and Apoptosis and Autophagy.	this gene include peptidase activity and cysteine-type peptidase activity	hsa04142	Lysosome	-	-
CTSL	Among its related pathways are Proteoglycans in cancer and Activated TLR4 signalling.	Gene Ontology (GO) annotations related to this gene include histone binding and cysteine-type peptidase activity.	hsa04142	Lysosome	-	-
TLR3	Among its related pathways are Activated TLR4 signalling and NF-kappaB Signaling.	Gene Ontology (GO) annotations related to this gene include identical protein binding and transmembrane signaling receptor activity.	hsa05167	Kaposi sarcoma-associated herpesvirus infection	-	-
CD24A	Among its related pathways are Developmental Biology and L1CAM interactions.	Gene Ontology (GO) annotations related to this gene include protein kinase binding and carbohydrate binding.	hsa04640	Hematopoietic cell lineage	-	-
ZC3H12A	ZC3H12A is an MCP1 (CCL2; MIM 158105)-induced protein that acts as a transcriptional activator and causes cell death of cardiomyocytes, possibly via induction of genes associated with apoptosis.	Gene Ontology (GO) annotations related to this gene include endonuclease activity.	-	-	19322177	Zc3h12a is an RNase essential for controlling immune responses by regulating mRNA decay
CD53	Among its related pathways are Innate Immune System.	Gene Ontology (GO) annotations related to this gene include regulation of growth.	-	-	31748347	The Tetraspanin CD53 Regulates Early B Cell Development by Promoting IL-7R Signaling
IL21R	Among its related pathways are Jak-Stat Signaling Pathway (sino) and Th17 cell differentiation.	Gene Ontology (GO) annotations related to this gene include interleukin-21 receptor activity.	-	-	26966515	IL-21 Signaling in Immunity
GBP7	Among its related pathways are Interferon gamma signaling and Cytokine Signaling in Immune system.	Gene Ontology (GO) annotations related to this gene include GTP binding and GTPase activity.	-	-	21551061	A family of IFN-γ-inducible 65-kD GTPases protects against bacterial infection
EPHB6	Among its related pathways are ERK Signaling and CREB Pathway.	Gene Ontology (GO) annotations related to this gene include transferase activity, transferring phosphorus-containing groups and protein tyrosine kinase activity.	-	-	31333644	Emerging Roles for Eph Receptors and Ephrin Ligands in Immunity
					29456630	Roles of Eph/ephrin bidirectional signaling in central nervous system injury and recovery
CD68	Among its related pathways are Innate Immune System and LDL Oxidation in Atherogenesis.	Gene Ontology (GO) annotations related to this gene include protein binding.	-	-	27869795	CD68/macrosialin: not just a histochemical marker
CCDC88B	Acts as a positive regulator of T-cell maturation and inflammatory function.	Gene Ontology (GO) annotations related to this gene include cytoskeleton.	-	-	25403443	CCDC88B is a novel regulator of maturation and effector functions of T cells during pathological inflammation
CAPN1	Among its related pathways are Innate Immune System and Integrin-mediated Cell Adhesion.	Gene Ontology (GO) annotations related to this gene include calcium ion binding and calcium-dependent cysteine-type endopeptidase activity.	-	-	21268016	Critical role of the calpain/calpastatin balance in acute allograft rejection
PDE8A	Among its related pathways are DAG and IP3 signaling and Signaling by GPCR.	Gene Ontology (GO) annotations related to this gene include obsolete signal transducer activity and 3',5'-cyclic-AMP phosphodiesterase activity.	-	-	28851628	PDE8 controls CD4 + T cell motility through the PDE8A-Raf-1 kinase signaling complex
ST3GAL1	Among its related pathways are Defective C1GALT1C1 causes Tn polyagglutination syndrome (TNPS) and O-linked glycosylation of mucins.	Gene Ontology (GO) annotations related to this gene include sialyltransferase activity and beta-galactoside (CMP) alpha-2,3-sialyltransferase activity.	-	-	12459555	Sialic acid capping of CD8beta core 1-O-glycans controls thymocyte-major histocompatibility complex class I interaction
IRF1	Among its related pathways are Interferon gamma signaling and IL12 signaling mediated by STAT4.	Gene Ontology (GO) annotations related to this gene include DNA-binding transcription factor activity and RNA polymerase II proximal promoter sequence-specific DNA binding.	-	-	28977839	Genetic defects of the IRF1-mediated major histocompatibility complex class I antigen presentation pathway occur prevalently in the JAK2 gene in non-small cell lung cancer
XBP1	Among its related pathways are Unfolded Protein Response (UPR) and Photodynamic therapy-induced unfolded protein response.	Gene Ontology (GO) annotations related to this gene include DNA-binding transcription factor activity and sequence-specific DNA binding.	-	-	32294597	The emerging role of XBP1 in cancer
IL1F9	Among its related pathways are Cytokine Signaling in Immune system and PEDF Induced Signaling.	Gene Ontology (GO) annotations related to this gene include cytokine activity and interleukin-1 receptor binding.	-	-	31619669	IL-36 promotes anti-viral immunity by boosting sensitivity to IFN-α/β in IRF1 dependent and independent manners
					31281320	Structural Basis of IL-1 Family Cytokine Signaling
TRIP6	Among its related pathways are LPA receptor mediated events and NOD-like receptor signaling pathway.	Gene Ontology (GO) annotations related to this gene include thyroid hormone receptor binding.	-	-	15657077	TRIP6 is a RIP2-associated common signaling component of multiple NF-kappaB activation pathways
SRGN	Among its related pathways are Response to elevated platelet cytosolic Ca2+.	Gene Ontology (GO) annotations related to this gene include collagen binding.	-	-	29588174	Serglycin is involved in inflammatory response in articular mouse chondrocytes
LILRA6	Among its related pathways are Innate Immune System and Immunoregulatory interactions between a Lymphoid and a non-Lymphoid cell.	Gene Ontology (GO) annotations related to this gene include inhibitory MHC class I receptor activity.	-	-	30208630	Leukocyte Immunoglobulin-Like Receptors A2 and A6 are Expressed in Avian Macrophages and Modulate Cytokine Production by Activating Multiple Signaling Pathways
immune-non-enriched genes (66)
ACVR1	Among its related pathways are PEDF Induced Signaling and PAK Pathway.	Gene Ontology (GO) annotations related to this gene include protein homodimerization activity and protein kinase activity.	-	-	-	-
ADAR	Among its related pathways are Interferon gamma signaling and ATP/ITP metabolism.	Gene Ontology (GO) annotations related to this gene include adenosine deaminase activity.	-	-	-	-
ADCY3	Among its related pathways are CCR5 Pathway in Macrophages and Longevity regulating pathway.	Gene Ontology (GO) annotations related to this gene include nucleotide binding and phosphorus-oxygen lyase activity.	-	-	-	-
ADGRE5	Among its related pathways are Innate Immune System and Presynaptic function of Kainate receptors.	Gene Ontology (GO) annotations related to this gene include G protein-coupled receptor activity and transmembrane signaling receptor activity.	-	-	-	-
ADORA2A	Among its related pathways are Peptide ligand-binding receptors and Activation of TRKA receptors.	Gene Ontology (GO) annotations related to this gene include G protein-coupled receptor activity and protein heterodimerization activity.	-	-	-	-
AHSG	Among its related pathways are Response to elevated platelet cytosolic Ca2+ and Innate Immune System.	Gene Ontology (GO) annotations related to this gene include cysteine-type endopeptidase inhibitor activity and kinase inhibitor activity.	-	-	-	-
ARPC1B	Among its related pathways are Development Slit-Robo signaling and G-protein signaling RAC1 in cellular process.	Gene Ontology (GO) annotations related to this gene include actin binding and structural constituent of cytoskeleton.	-	-	-	-
ARSA	Among its related pathways are Metabolism of proteins and Innate Immune System.	Gene Ontology (GO) annotations related to this gene include calcium ion binding and arylsulfatase activity.	-	-	-	-
ASAH1	Among its related pathways are S-1P Stimulated Signaling and Innate Immune System.	Gene Ontology (GO) annotations related to this gene include N-acylsphingosine amidohydrolase activity.	-	-	-	-
ASB2	Among its related pathways are Class I MHC mediated antigen processing and presentation and Innate Immune System.	Gene Ontology (GO) annotations related to this gene include ubiquitin-protein transferase activity.	-	-	-	-
ATF6	Among its related pathways are TCR Signaling (Qiagen) and Sertoli-Sertoli Cell Junction Dynamics.	Gene Ontology (GO) annotations related to this gene include DNA-binding transcription factor activity and protein heterodimerization activity.	-	-	-	-
ATP6V1B2	Among its related pathways are Innate Immune System and PI3K / Akt Signaling.	Gene Ontology (GO) annotations related to this gene include proton transmembrane transporter activity.	-	-	-	-
ATP6V1C1	Among its related pathways are Wax biosynthesis and Vitamin digestion and absorption.	Gene Ontology (GO) annotations related to this gene include transferase activity, transferring acyl groups other than amino-acyl groups and long-chain-alcohol O-fatty-acyltransferase activity. A	-	-	-	-
B4GALT1	Among its related pathways are Metabolism of proteins and Innate Immune System.	Gene Ontology (GO) annotations related to this gene include protein homodimerization activity and cytoskeletal protein binding.	-	-	-	-
BTBD6	Among its related pathways are Innate Immune System and Class I MHC mediated antigen processing and presentation.	Gene Ontology (GO) annotations related to this gene include protein binding.	-	-	-	-
C3AR1	Among its related pathways are Peptide ligand-binding receptors and Immune response Lectin induced complement pathway.	Gene Ontology (GO) annotations related to this gene include G protein-coupled receptor activity and complement component C3a receptor activity.	-	-	-	-
CADM1	Among its related pathways are Cell junction organization and Cell adhesion molecules.	Gene Ontology (GO) annotations related to this gene include protein homodimerization activity and PDZ domain binding.	-	-	-	-
CD207	Among its related pathways are Dendritic Cells Developmental Lineage Pathway and CDK-mediated phosphorylation and removal of Cdc6.	Gene Ontology (GO) annotations related to this gene include carbohydrate binding and mannose binding.	-	-	-	-
CFI	Among its related pathways are Immune response Lectin induced complement pathway and Innate Immune System.	Gene Ontology (GO) annotations related to this gene include serine-type endopeptidase activity and scavenger receptor activity.	-	-	-	-
CHD3	Among its related pathways are Development NOTCH1-mediated pathway for NF-KB activity modulation and Chromatin organization.	Gene Ontology (GO) annotations related to this gene include helicase activity.	-	-	-	-
CLCF1	Among its related pathways are Cytokine Signaling in Immune system and Interleukin-6 family signaling.	Gene Ontology (GO) annotations related to this gene include protein heterodimerization activity and cytokine activity.	-	-	-	-
CPNE8	Diseases associated with CPNE8 include B-Cell Adult Acute Lymphocytic Leukemia.	Gene Ontology (GO) annotations related to this gene include molecular_function, protein binding, calcium-dependent phospholipid binding and metal ion binding.	-	-	-	-
DECR2	Among its related pathways are Metabolism and Peroxisome.	Gene Ontology (GO) annotations related to this gene include signaling receptor binding and 2,4-dienoyl-CoA reductase (NADPH) activity.	-	-	-	-
DIAPH1	Among its related pathways are Innate Immune System and AGE/RAGE pathway.	Gene Ontology (GO) annotations related to this gene include nucleotide binding.	-	-	-	-
DNASE1L2	May play an immune role by eliminating harmful DNA released into the extracellular environment by damaged epidermal cells.	Gene Ontology (GO) annotations related to this gene include calcium ion binding and deoxyribonuclease activity.	-	-	-	-
DPP7	Among its related pathways are Innate Immune System.	Gene Ontology (GO) annotations related to this gene include serine-type peptidase activity and dipeptidyl-peptidase activity.	-	-	-	-
EFHD2	Controls spontaneous apoptosis through the regulation of BCL2L1 abundance.	Gene Ontology (GO) annotations related to this gene include calcium ion binding.	-	-	-	-
EVI2B	Required for granulocyte differentiation and functionality of hematopoietic progenitor cells through the control of cell cycle progression and survival of hematopoietic progenitor cells.	Gene Ontology (GO) annotations related to this gene include membrane and integral component of membrane.	-	-	-	-
FBXL14	Among its related pathways are Class I MHC mediated antigen processing and presentation and Innate Immune System.	Gene Ontology (GO) annotations related to this gene include ubiquitin-protein transferase activity.	-	-	-	-
FURIN	Among its related pathways are Notch Signaling Pathway and Transcriptional activity of SMAD2/SMAD3-SMAD4 heterotrimer.	Gene Ontology (GO) annotations related to this gene include serine-type endopeptidase activity and serine-type endopeptidase inhibitor activity.	-	-	-	-
GGTA1	Aberrant expression of the GGTA1 protein in man can lead to autoimmune diseases and sometimes germ cell tumors.	Gene Ontology (GO) annotations related to this gene include molecular function and hexosyltransferase activity.	-	-	-	-
GIMAP5	Among its related pathways are NF-kappaB Signaling and Apoptosis and Autophagy.	Gene Ontology (GO) annotations related to this gene include GTP binding.	-	-	-	-
GLA	Among its related pathways are Glycerolipid metabolism and Innate Immune System.	Gene Ontology (GO) annotations related to this gene include protein homodimerization activity and hydrolase activity.	-	-	-	-
GNG2	Among its related pathways are Platelet homeostasis and CCR5 Pathway in Macrophages.	Gene Ontology (GO) annotations related to this gene include obsolete signal transducer activity and G-protein beta-subunit binding.	-	-	-	-
GPATCH3	Involved in transcriptional regulation. It is able to activate transcription from the CXCR4 promoter.	Gene Ontology (GO) annotations related to this gene include nucleic acid binding.	-	-	-	-
GRN	Among its related pathways are Innate Immune System and Integrated Breast Cancer Pathway.	Gene Ontology (GO) annotations related to this gene include growth factor activity.	-	-	-	-
HCLS1	Among its related pathways are Proteoglycans in cancer and NF-kappaB Signaling.	Gene Ontology (GO) annotations related to this gene include protein kinase binding.	-	-	-	-
HOMER3	Among its related pathways are Protein-protein interactions at synapses and Circadian entrainment.	Gene Ontology (GO) annotations related to this gene include protein domain specific binding and G protein-coupled glutamate receptor binding.	-	-	-	-
ITGAX	Among its related pathways are Integrin Pathway and Actin Nucleation by ARP-WASP Complex.	Gene Ontology (GO) annotations related to this gene include signaling receptor activity.	-	-	-	-
LHFPL2	Among its related pathways are Response to elevated platelet cytosolic Ca2+.	Gene Ontology (GO) annotations related to this gene include molecular function and protein binding.	-	-	-	-
LRR1	Among its related pathways are Class I MHC mediated antigen processing and presentation and Innate Immune System.	Gene Ontology (GO) annotations related to this gene include isomerase activity.	-	-	-	-
LTBP3	Among its related pathways are GPCR Pathway and PAK Pathway.	Gene Ontology (GO) annotations related to this gene include calcium ion binding and transforming growth factor beta binding.	-	-	-	-
MAP3K6	Among its related pathways are TCR Signaling (Qiagen) and 4-1BB Pathway.	Gene Ontology (GO) annotations related to this gene include transferase activity, transferring phosphorus-containing groups and protein tyrosine kinase activity.	-	-	-	-
MEFV	Among its related pathways are Innate Immune System and Yersinia infection.	Gene Ontology (GO) annotations related to this gene include actin binding.	-	-	-	-
NUGGC	Nuclear GTPase found in germinal center B-cells, where it may inhibit function of the activation-induced cytidine deaminase AICDA.	Gene Ontology (GO) annotations related to this gene include GTP binding and GTPase activity.	-	-	-	-
PARP14	Among its related pathways are Granzyme Pathway and Metabolism of water-soluble vitamins and cofactors.	Gene Ontology (GO) annotations related to this gene include NAD+ ADP-ribosyltransferase activity.	-	-	-	-
PLEK	Among its related pathways are Response to elevated platelet cytosolic Ca2+.	Gene Ontology (GO) annotations related to this gene include protein homodimerization activity and phosphatidylinositol-3,4-bisphosphate binding.	-	-	-	-
PRMT1	Among its related pathways are Direct p53 effectors and Apoptotic Pathways in Synovial Fibroblasts.	Gene Ontology (GO) annotations related to this gene include RNA binding and methyltransferase activity. An important paralog of this gene is PRMT8.	-	-	-	-
PSMB5	Among its related pathways are HIV Life Cycle and RET signaling.	Gene Ontology (GO) annotations related to this gene include peptidase activity and threonine-type endopeptidase activity.	-	-	-	-
PSME2	Among its related pathways are TCR signaling (REACTOME) and Cell Cycle Checkpoints.	Gene Ontology (GO) annotations related to this gene include protein binding, identical protein binding and endopeptidase activator activity.	-	-	-	-
PTGDR2	Among its related pathways are Peptide ligand-binding receptors and Signaling by GPCR.	Gene Ontology (GO) annotations related to this gene include G protein-coupled receptor activity and prostaglandin F receptor activity.	-	-	-	-
RBMS1	Diseases associated with RBMS1 include Diffuse Glomerulonephritis and Epidermolysis Bullosa, Junctional, Herlitz Type.	Gene Ontology (GO) annotations related to this gene include nucleic acid binding and RNA binding.	-	-	-	-
RGS1	Among its related pathways are CXCR4-mediated signaling events and Signaling by GPCR. Gene Ontology (GO) annotations related to this gene include GTPase activator activity and calmodulin binding.	Gene Ontology (GO) annotations related to this gene include GTPase activator activity and calmodulin binding.	-	-	-	-
RNF145	Promotes monoubiquitination of CYBA and 'Lys-48'-linked polyubiquitination and degradation of CYBB NADPH oxidase catalytic subunits, both essential for the generation of antimicrobial reactive oxygen species. Involved in the maintenance of cholesterol homeostasis.	Gene Ontology (GO) annotations related to this gene include ubiquitin protein ligase activity, transferase activity and metal ion binding.	-	-	-	-
SETD4	Among its related pathways are PKMTs methylate histone lysines.	Gene Ontology (GO) annotations related to this gene include methyltransferase activity.	-	-	-	-
SLA	Among its related pathways are PDGFR-beta signaling pathway and MAPK-Erk Pathway.	Gene Ontology (GO) annotations related to this gene include SH3/SH2 adaptor activity.	-	-	-	-
SLPI	Among its related pathways are Innate Immune System.	Gene Ontology (GO) annotations related to this gene include enzyme binding and endopeptidase inhibitor activity.	-	-	-	-
SNX25	Diseases associated with SNX25 include Spinocerebellar Ataxia, Autosomal Recessive 20 and Mental Retardation, Autosomal Dominant 38.	Gene Ontology (GO) annotations related to this gene include phosphatidylinositol binding and type I transforming growth factor beta receptor binding.	-	-	-	-
SORL1	Among its related pathways are Neuroscience and Activated PKN1 stimulates transcription of AR (androgen receptor) regulated genes KLK2 and KLK3.	Gene Ontology (GO) annotations related to this gene include transmembrane signaling receptor activity and low-density lipoprotein particle binding.	-	-	-	-
TCIRG1	Among its related pathways are Innate Immune System and Metabolism.	Gene Ontology (GO) annotations related to this gene include transporter activity and proton transmembrane transporter activity.	-	-	-	-
TRIM26	Among its related pathways are Interferon gamma signaling and Cytokine Signaling in Immune system.	Gene Ontology (GO) annotations related to this gene include cellular component and nucleus.	-	-	-	-
TRIM41	Among its related pathways are Class I MHC mediated antigen processing and presentation and Innate Immune System.	Gene Ontology (GO) annotations related to this gene include ligase activity.	-	-	-	-
TWSG1	Among its related pathways are Mesodermal Commitment Pathway.	Gene Ontology (GO) annotations related to this gene include protein binding and transforming growth factor beta binding.	-	-	-	-
VASN	May act as an inhibitor of TGF-beta signaling.	Gene Ontology (GO) annotations related to this gene include transforming growth factor beta binding.	-	-	-	-
VPS18	Among its related pathways are Salmonella infection (KEGG).	Gene Ontology (GO) annotations related to this gene include binding and syntaxin binding.	-	-	-	-
YBX3	Binds to the GM-CSF promoter. Seems to act as a repressor. Among its related pathways are Sertoli-Sertoli Cell Junction Dynamics and Cytoskeleton remodeling Regulation of actin cytoskeleton by Rho GTPases.	Gene Ontology (GO) annotations related to this gene include nucleic acid binding and DNA-binding transcription factor activity.	-	-	-	-
