# Supplementary figures and images for: Transdermal nanolipoplex simultaneously inhibits subcutaneous melanoma growth and suppresses systemically metastatic melanoma by activating host immunity
Source: Research Square preprint supplement (doi:10.21203/rs.3.rs-1425588/v1), 2022-03-10

Additional file 1

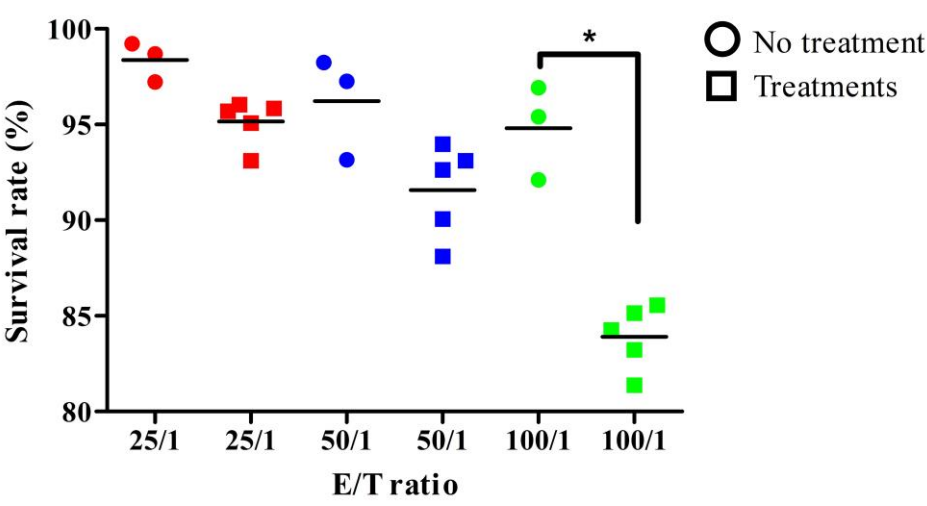

Supplement: Supplementary file 1 [file 02f71bd8d4b3f5f0cfcee830.pdf]
